# Supplementary material
Source: MDPI journal article supplement (https://www.mdpi.com/2076-3298/11/5/89)
Supplement: s1 [file s1]

# Detection and Screening of Organic Contaminants in A Riverine System of Georgia Using Non-Targeted Analysis

Gayatri Basapuram <sup>1,†</sup>, Srimanti Duttagupta <sup>1,†</sup> and Avishek Dutta <sup>1,2,\*</sup>

<sup>1</sup> Department of Geology, University of Georgia, Athens, GA 30602, USA; gayatri.basapuram@uga.edu (G.B.); sduttagupta@uga.edu (S.D.)

<sup>2</sup> Savannah River Ecology Laboratory, University of Georgia, Aiken, SC 29802, USA

\* Correspondence: avishek.dutta@uga.edu

† These authors contributed equally to this work.

## 1. Microbial degradation study of malathion in different environmental conditions

Ultra-purified type 1 water (Elga® water purification system, UK) was considered as a laboratory blank. HgCl<sub>2</sub> was added to laboratory blank and also in samples to prevent the growth of microorganisms in water samples by acting as a bacteriostatic agent.

The study is continued using the samples from Firefly trial, the type1 water is the ultra-purified water, which is considered as the lab blank; HgCl<sub>2</sub> is taken from a stock solution that is prepared using 0.8 gm in 40 mL in water out of which 5 mL is added to the sample resulting in an end concentration of 0.1%. The autoclaved water and HgCl<sub>2</sub> water are the blanks for the experiment; the river water is autoclaved at 121 °C for 30 minutes. The malathion that is used for the analysis is commercial grade and filtered using 0.22 µm filter, 400 µL of the filtered pesticide is used for the sample preparation. Two sets of study are framed to understand the reproducibility (observe the consistency of the result).

**Table S1.** Experiment conditions for the microbial degradation of pesticides.

| Name  | Environmental conditions                                                       | Sample type                              | Laboratory condition before addition of pesticide |
|-------|--------------------------------------------------------------------------------|------------------------------------------|---------------------------------------------------|
| Set 1 | 0.2% malathion                                                                 | Firefly trail - sample water             | None                                              |
| Set 2 | 0.2% malathion                                                                 | Ultra-purified type 1 water as lab blank | None                                              |
| Set 3 | 0.2% malathion + HgCl <sub>2</sub> (resulting in an end concentration of 0.1%) | Firefly trail - sample water             | None                                              |
| Set 4 | 0.2% malathion                                                                 | Firefly trail - sample water             | Autoclaved at 121 °C for 30 mins                  |

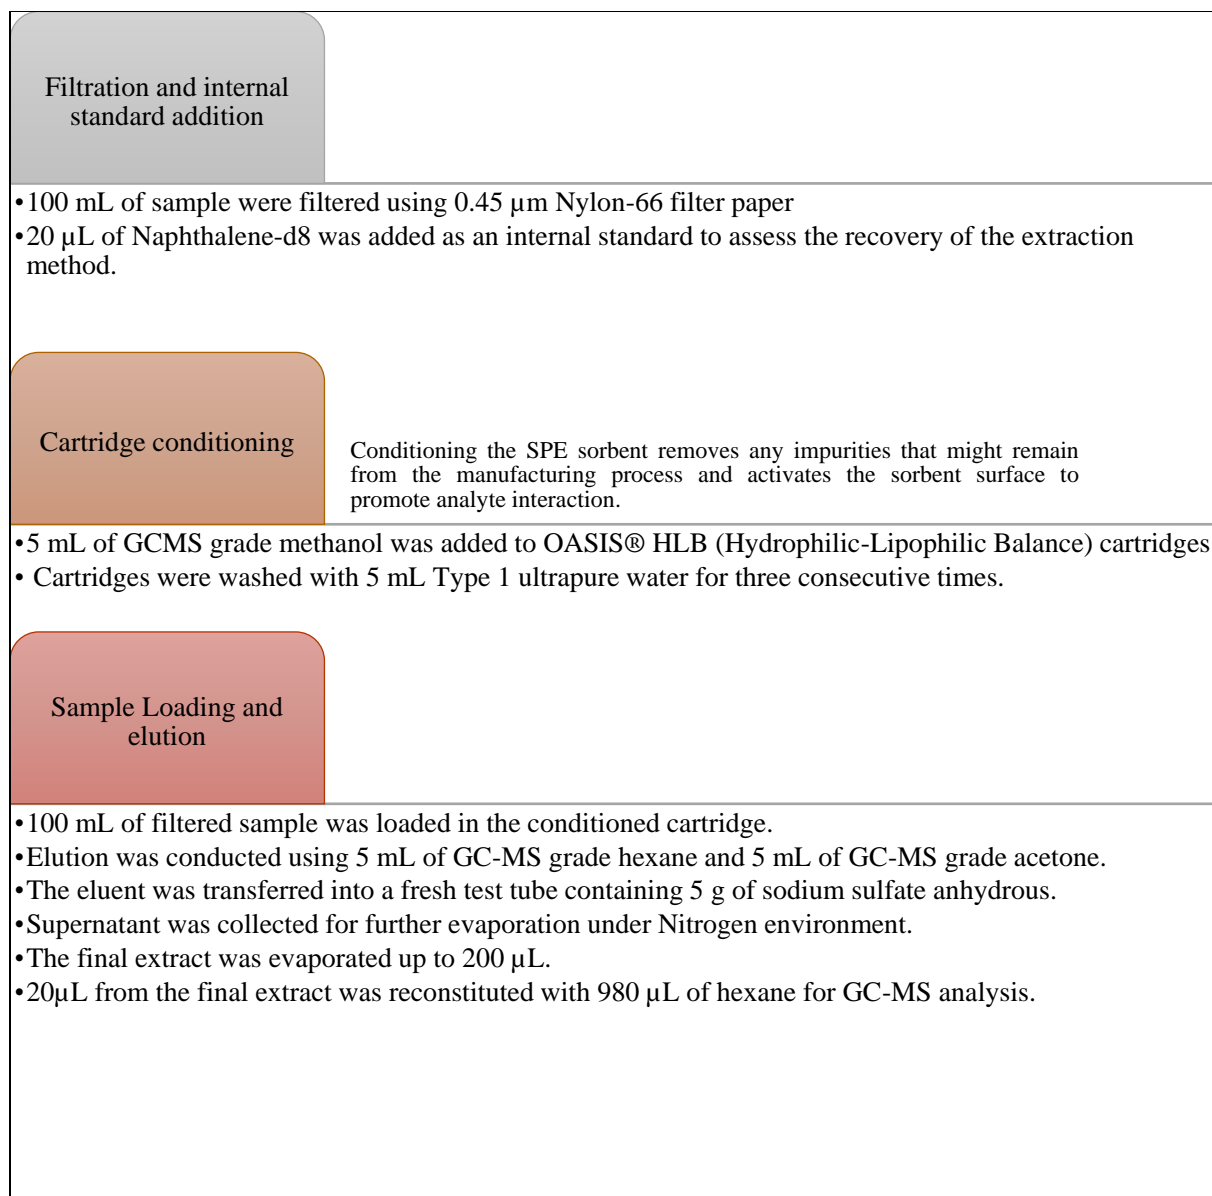

**Figure S1.** Schematic flow chart for the extraction of water sample using solid phase extraction.

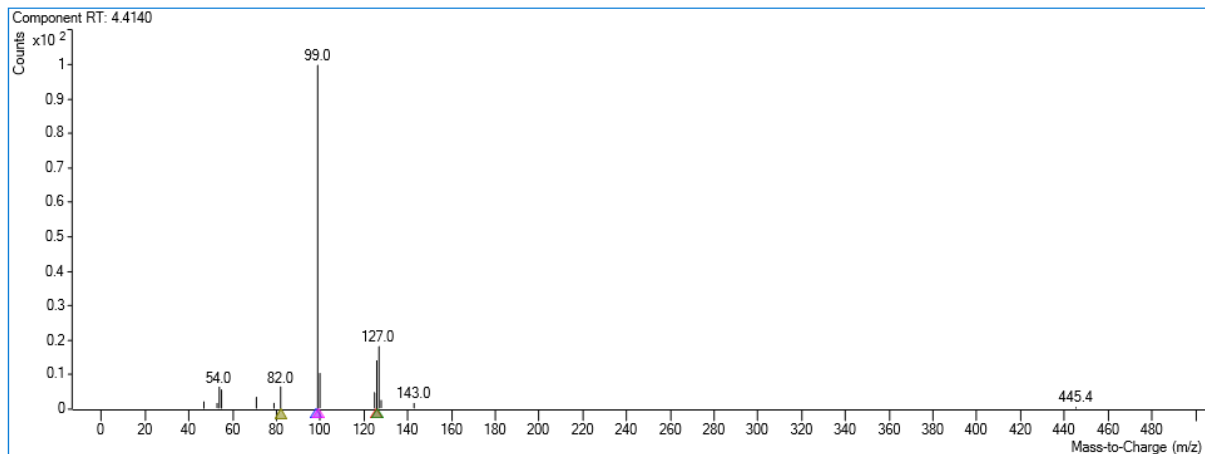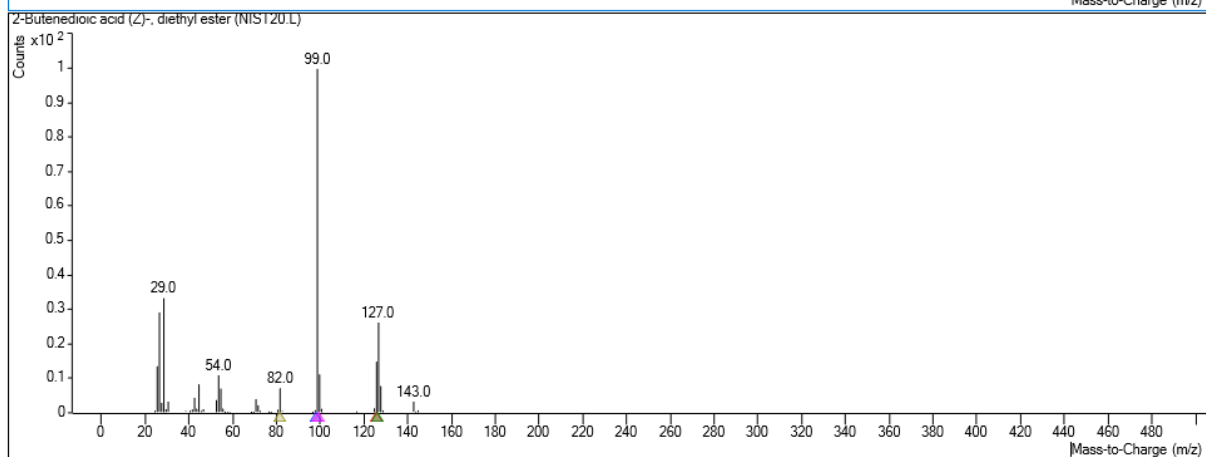

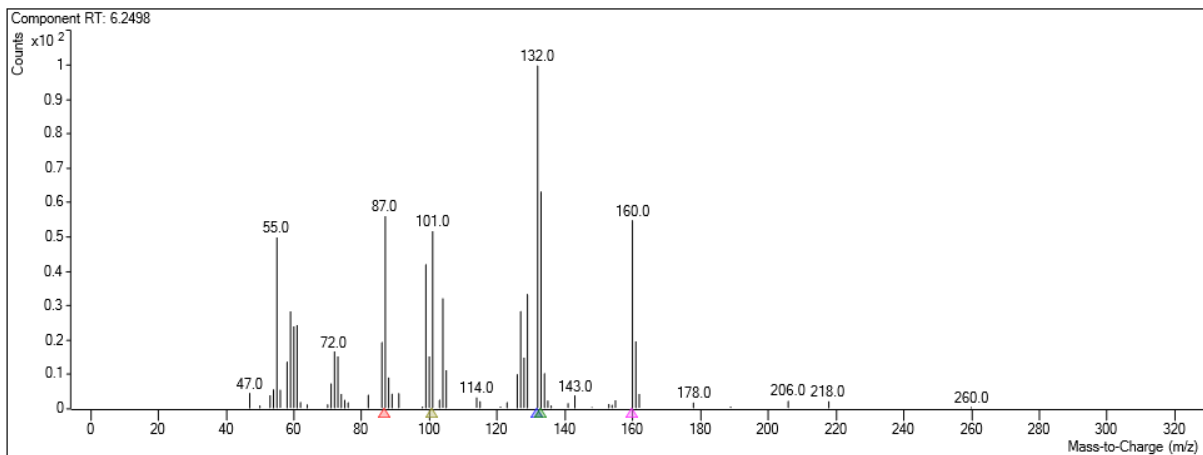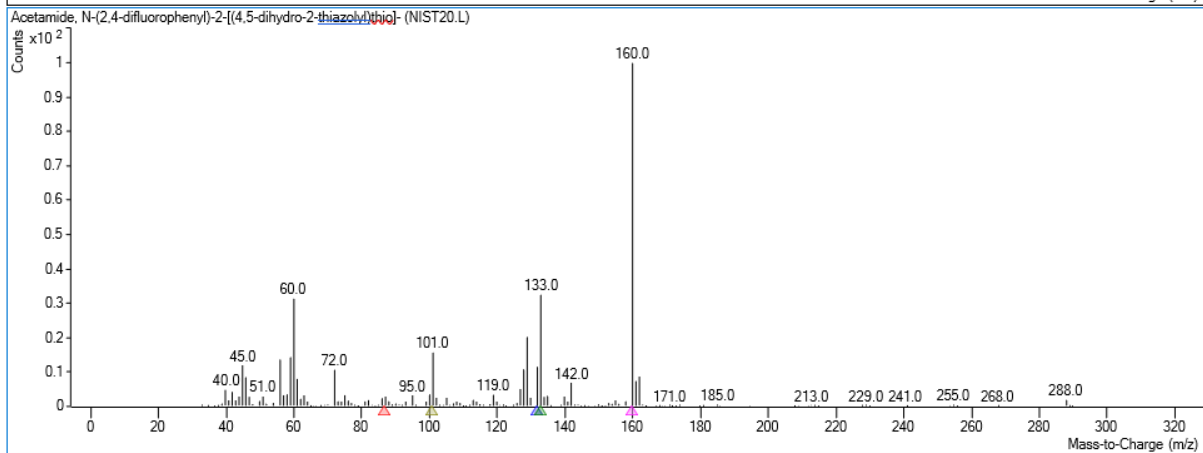

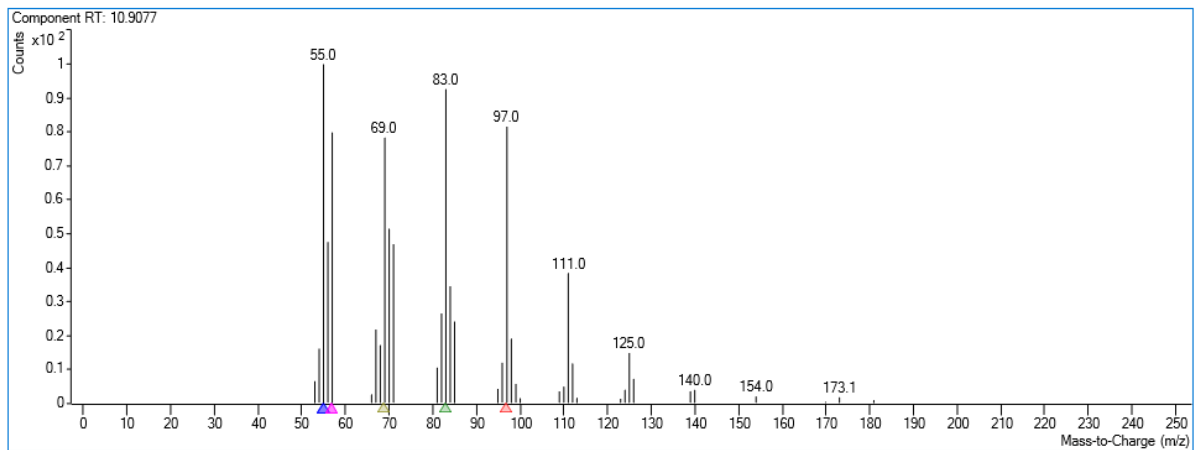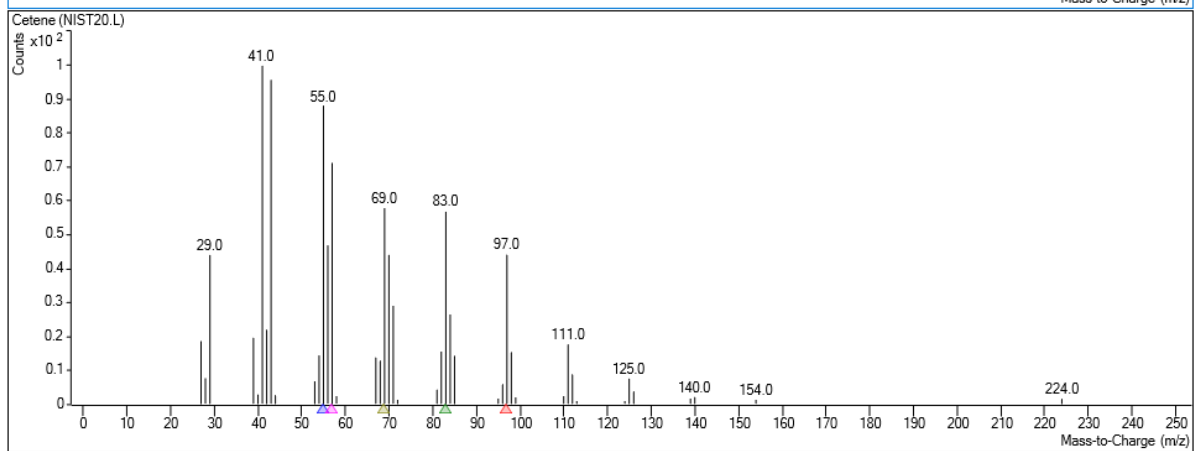

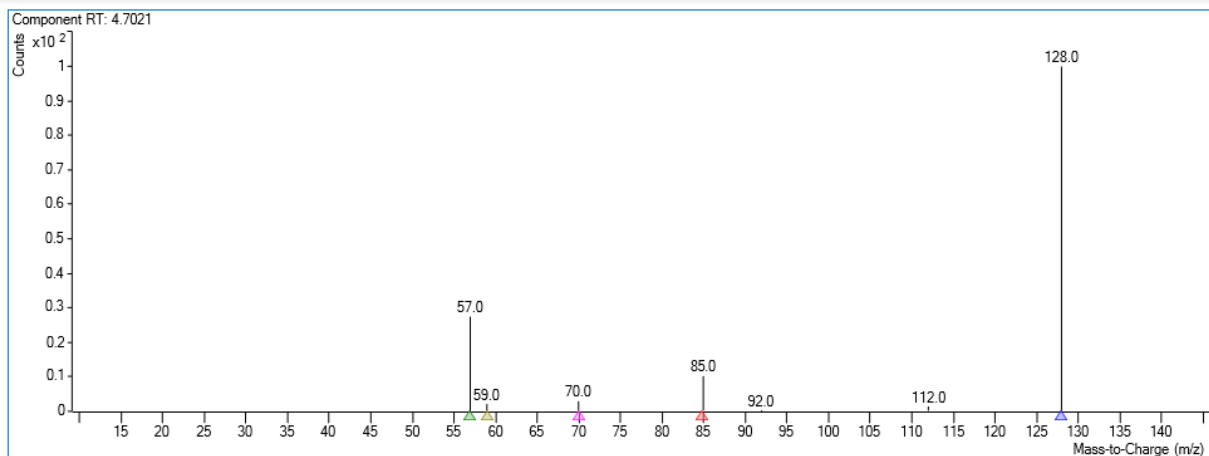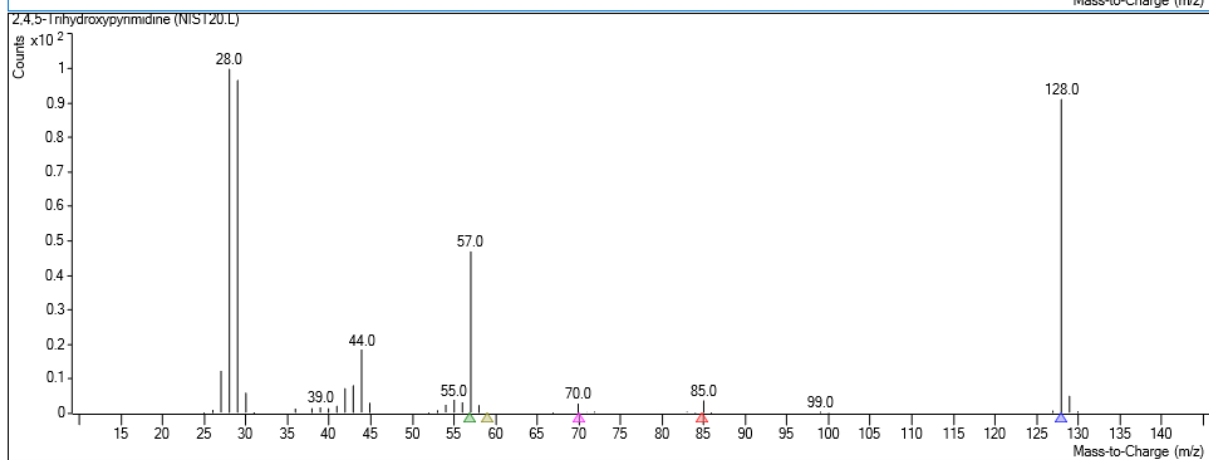

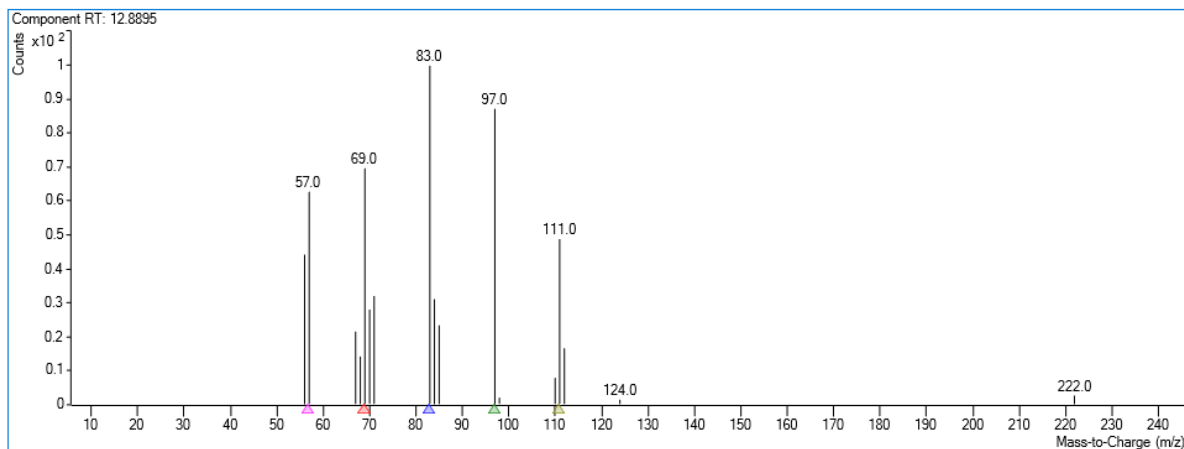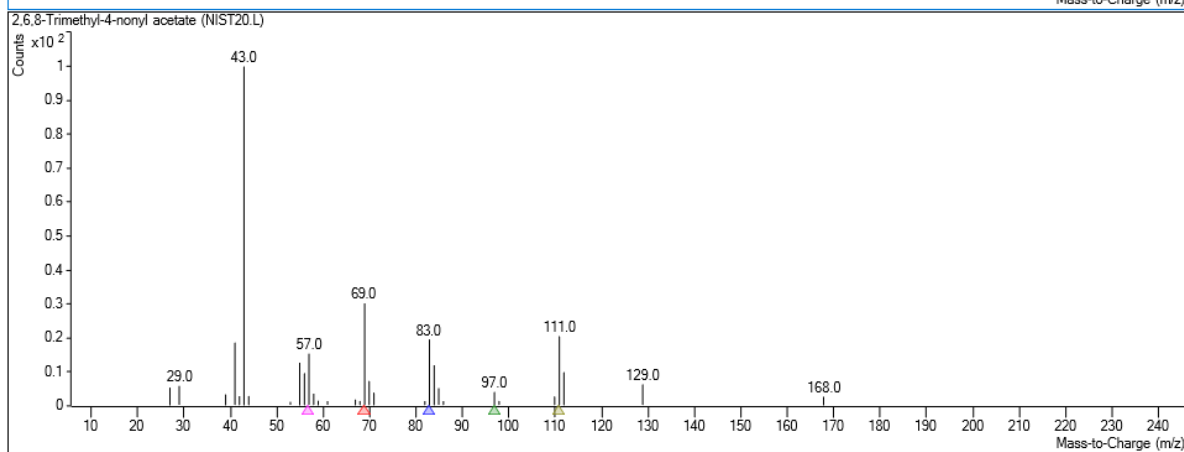

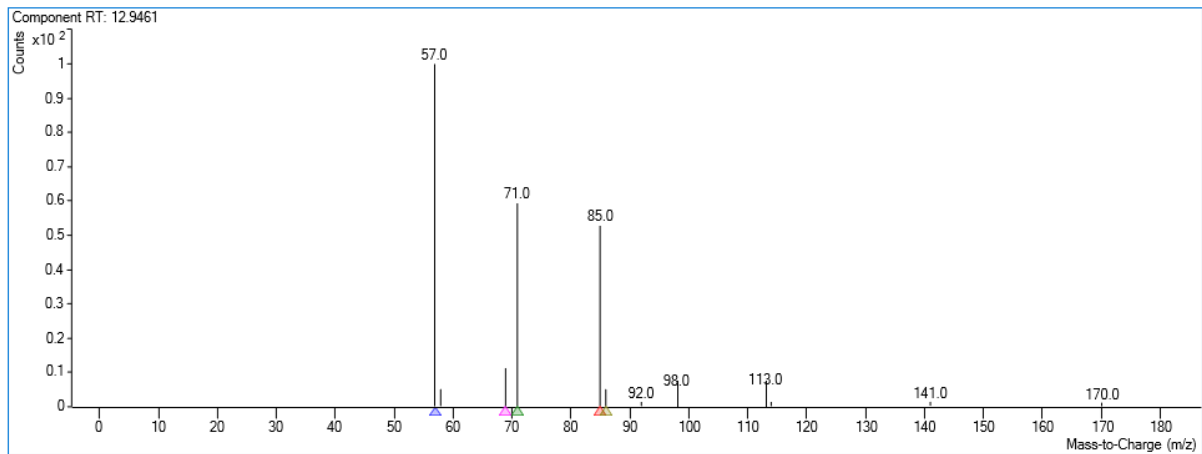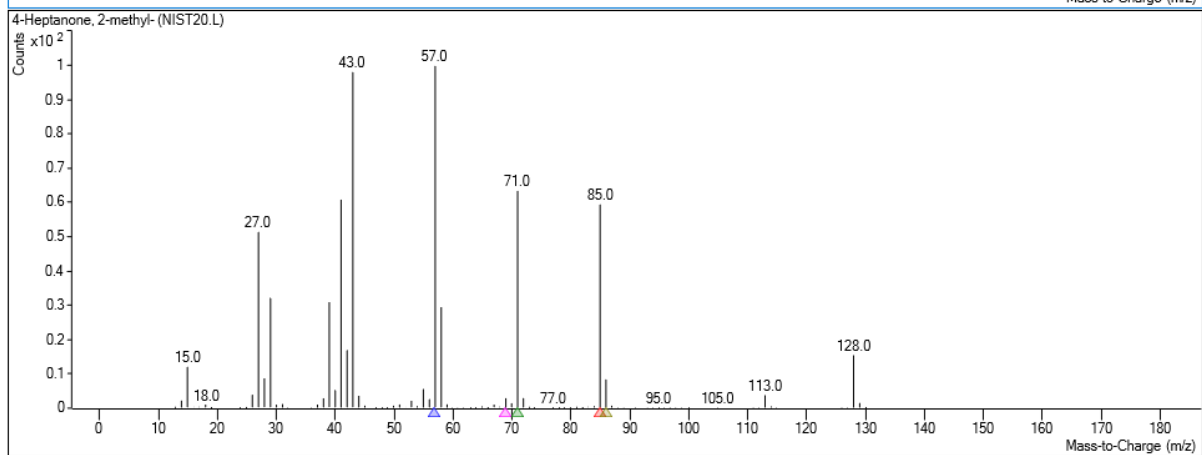



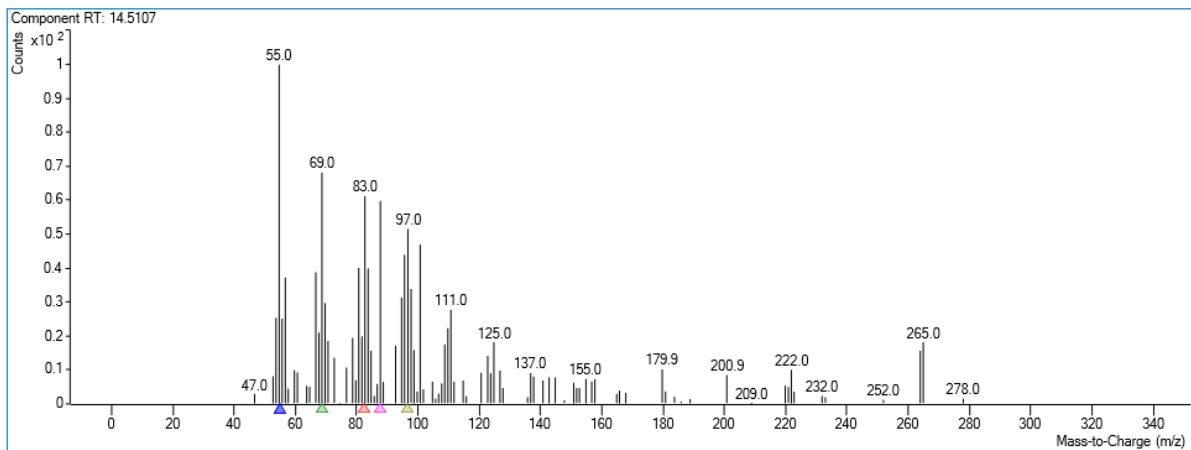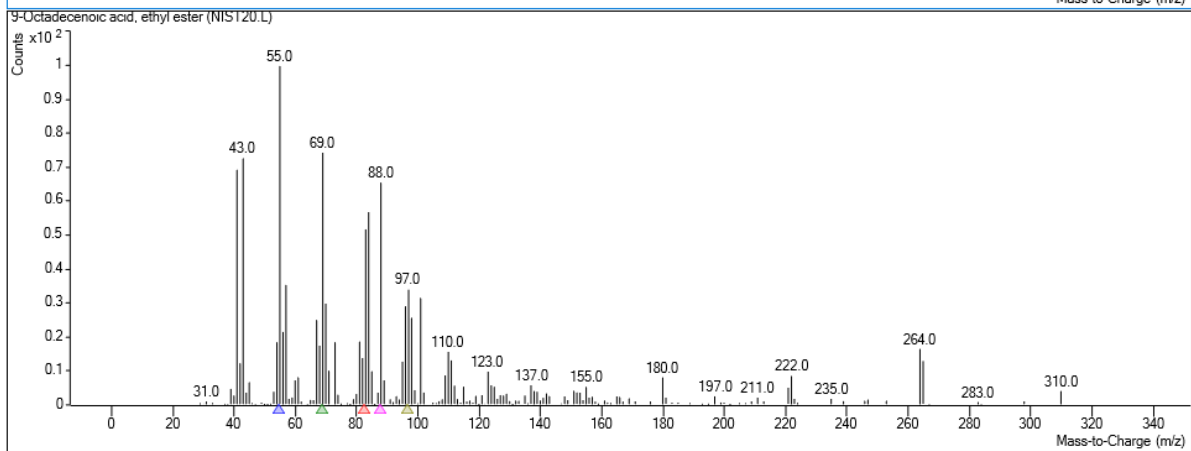

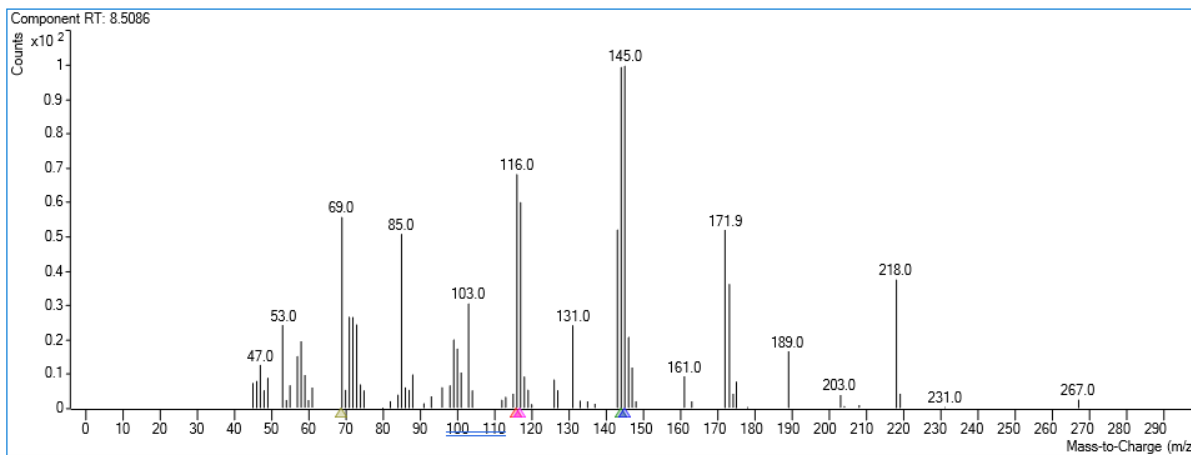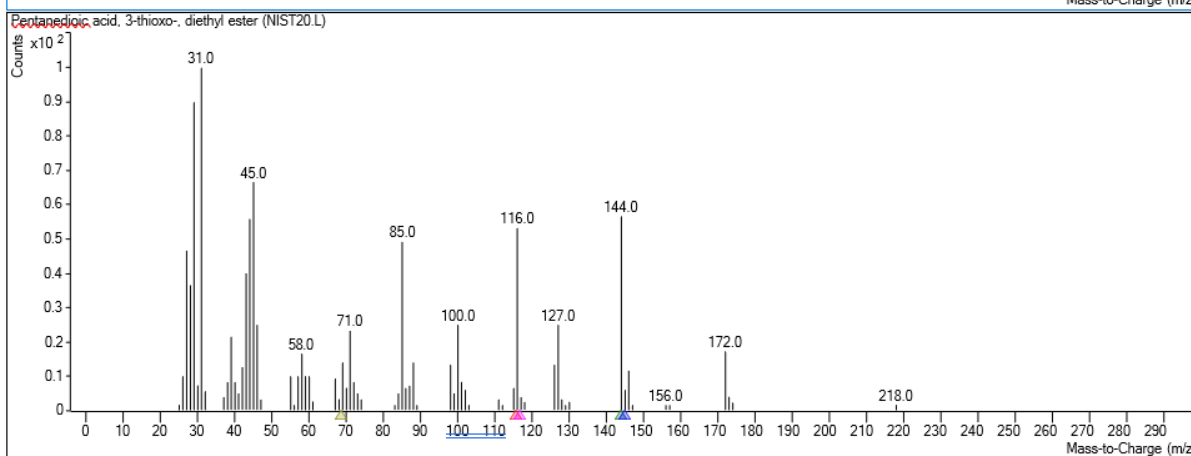

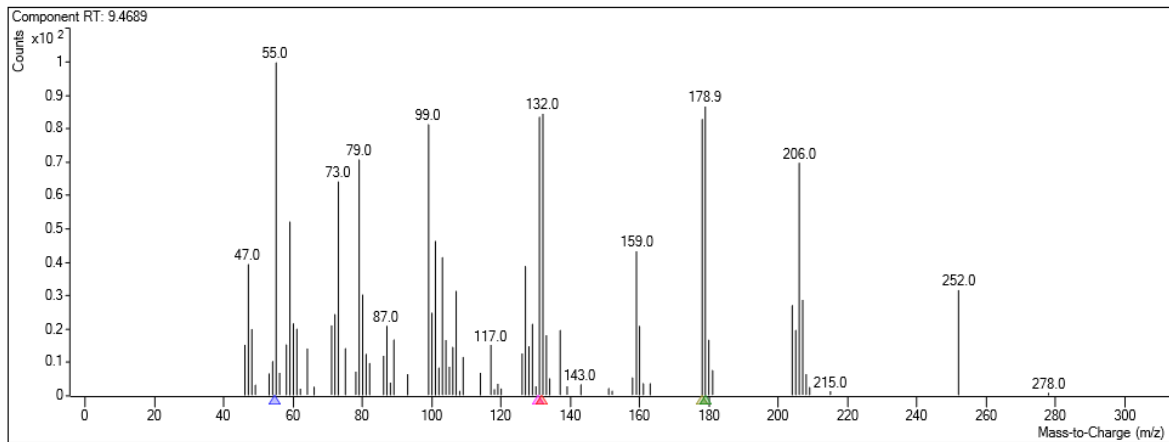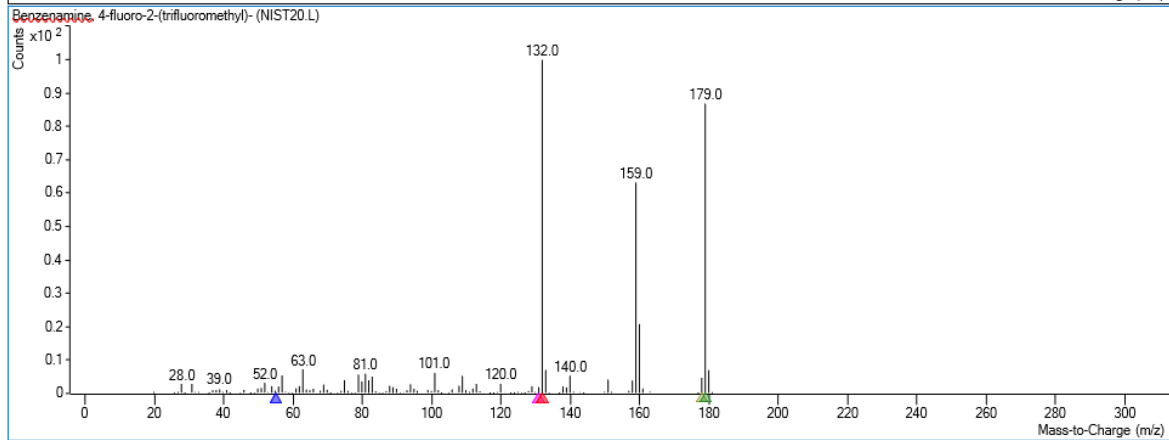

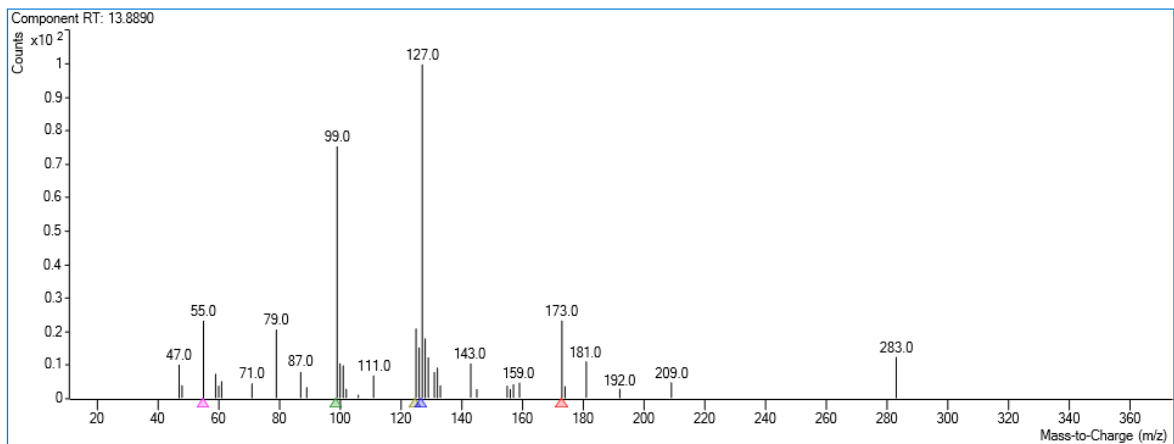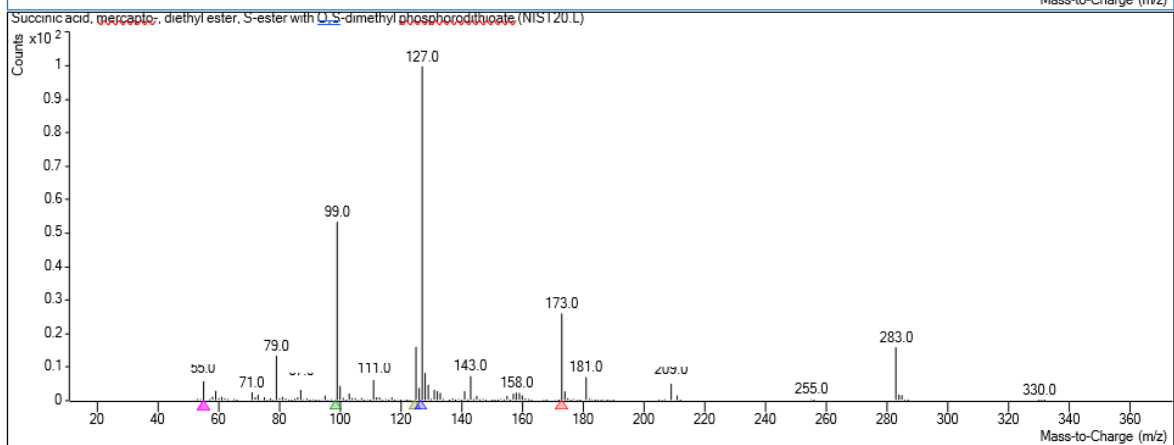

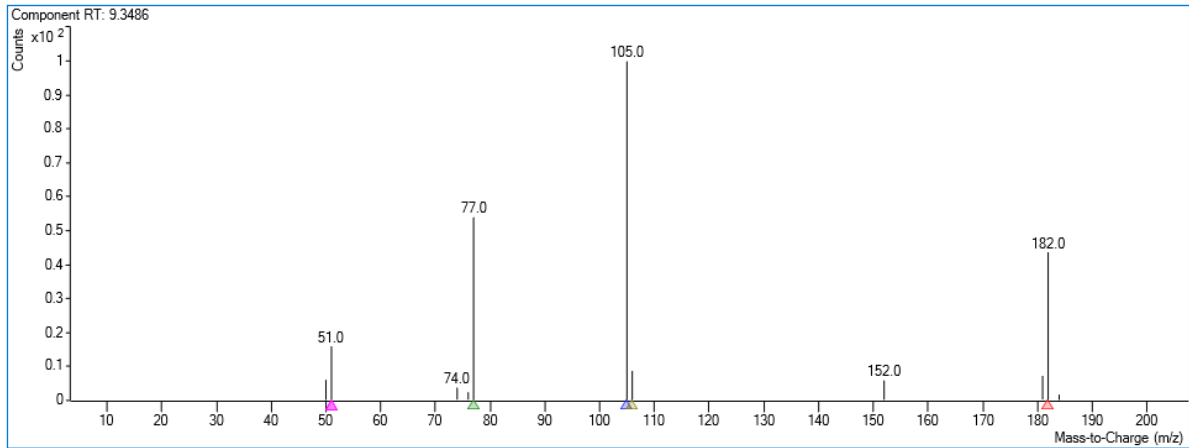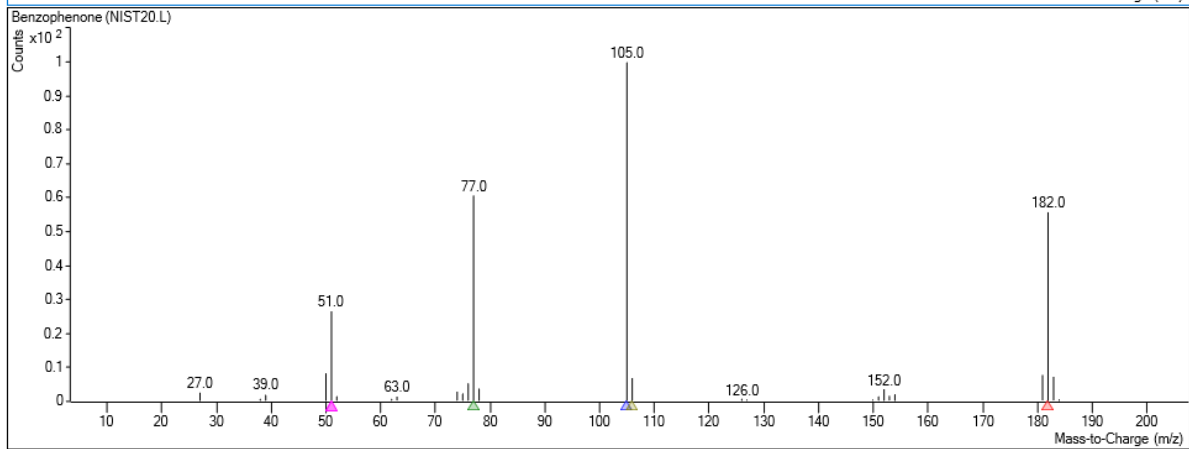

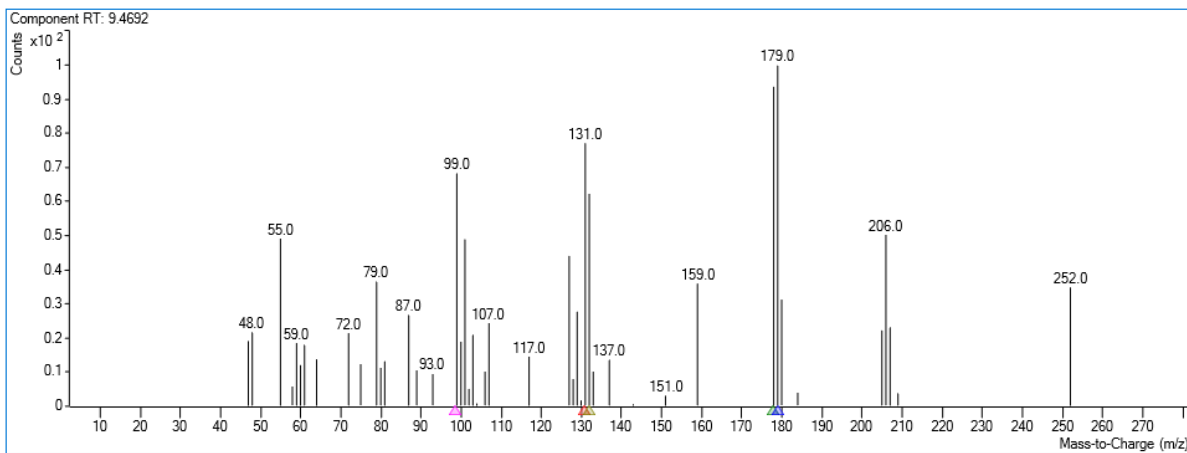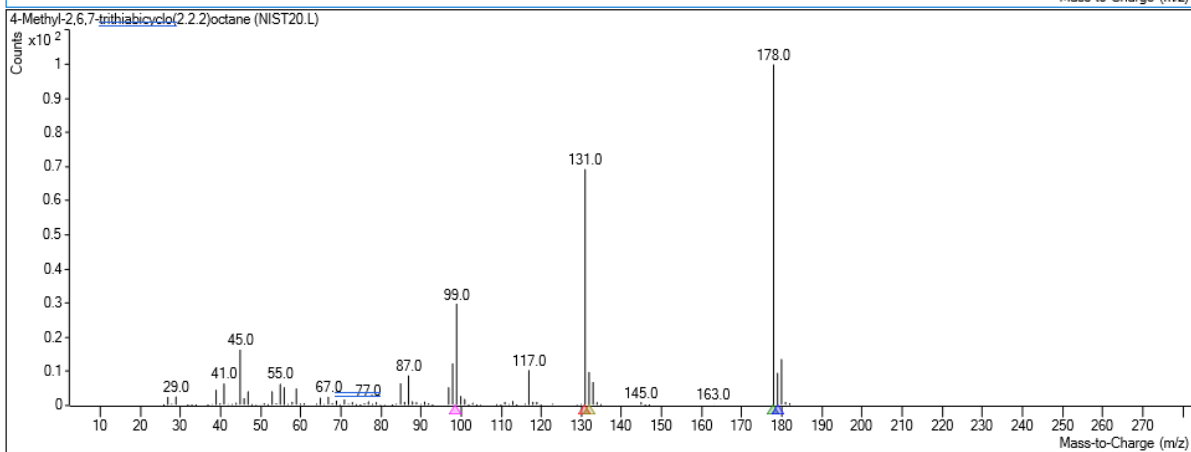

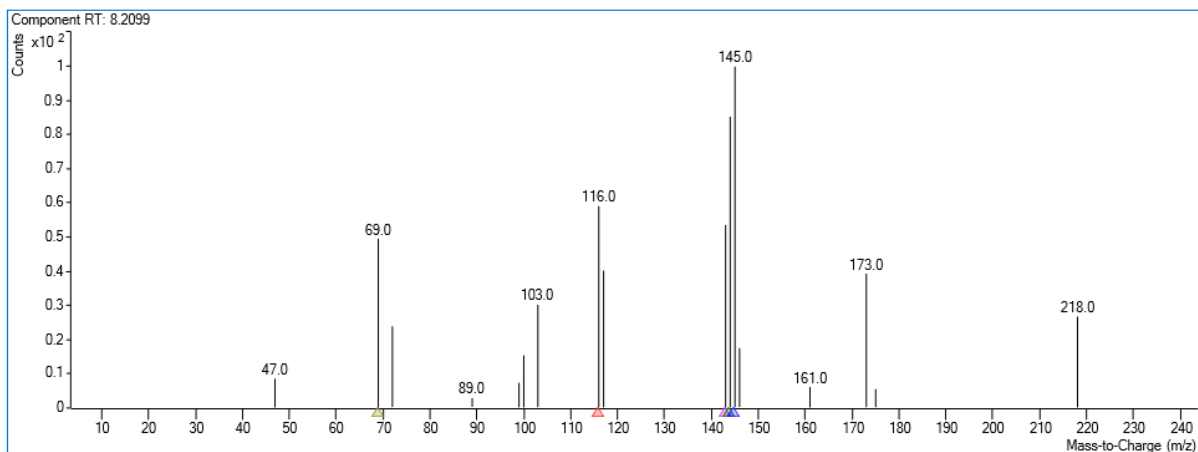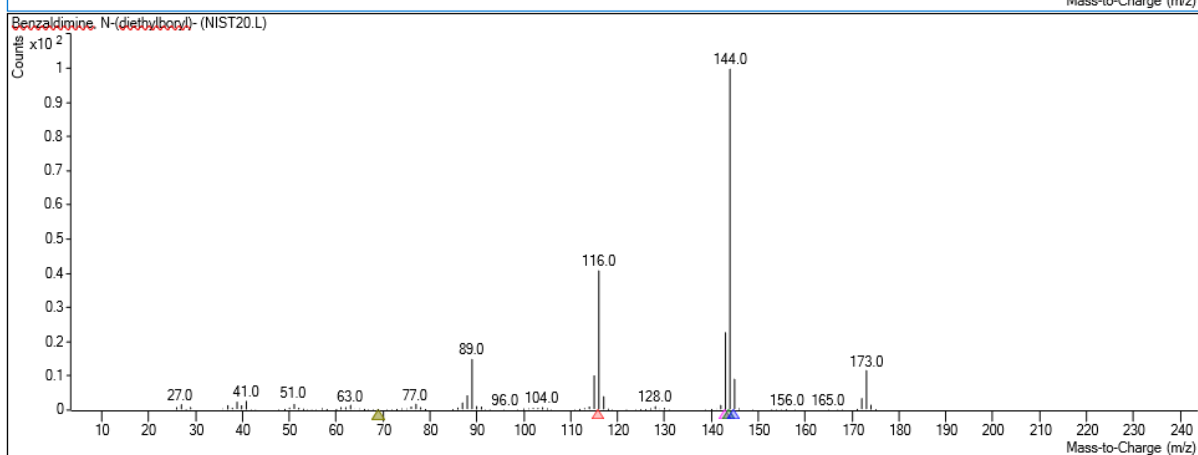

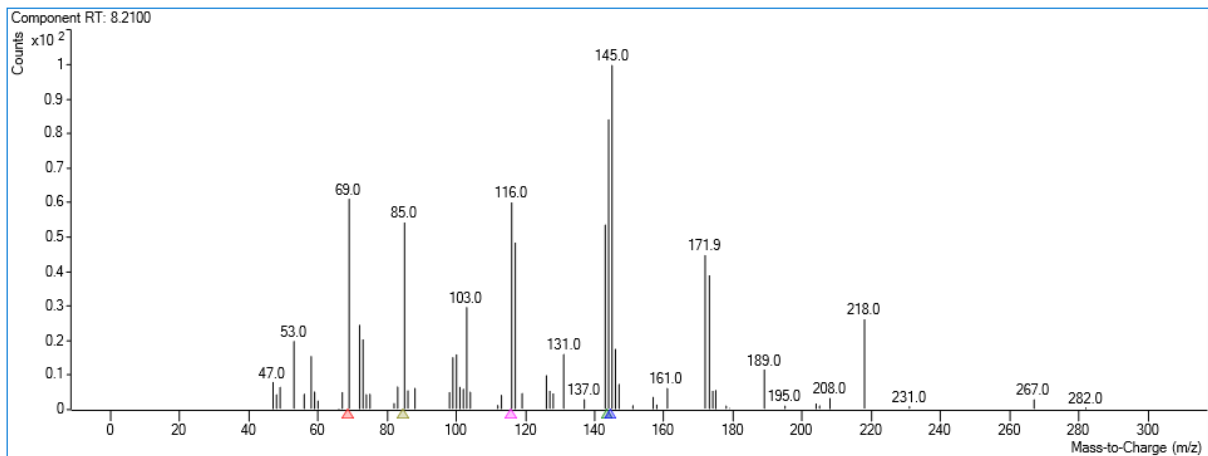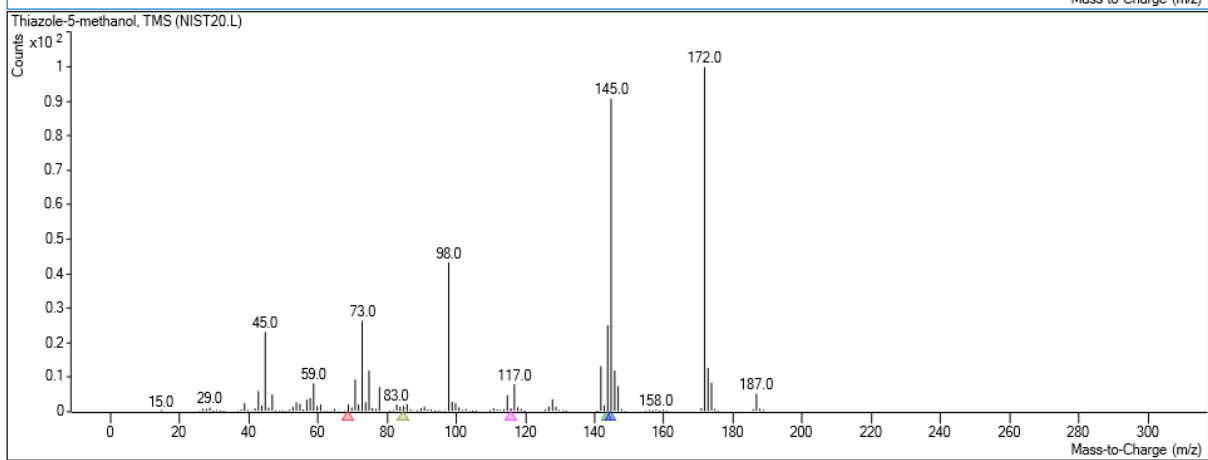



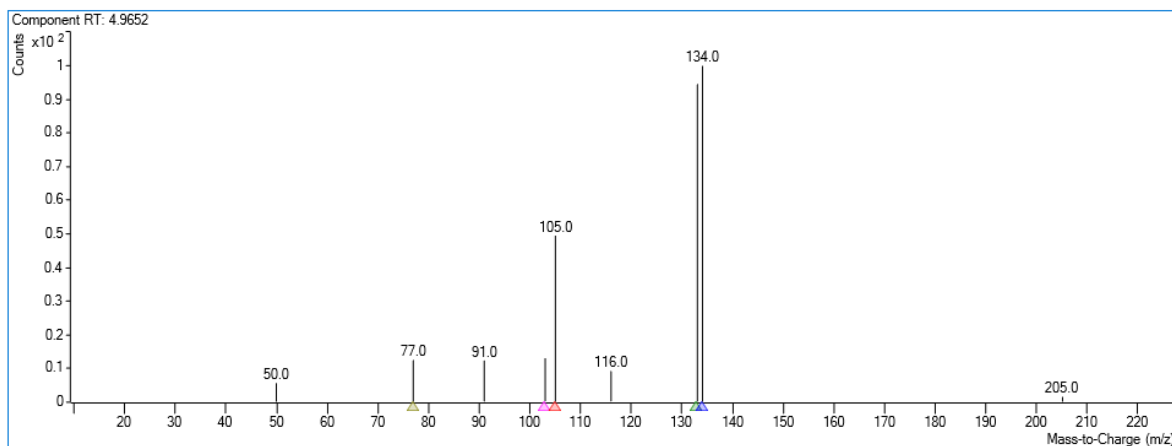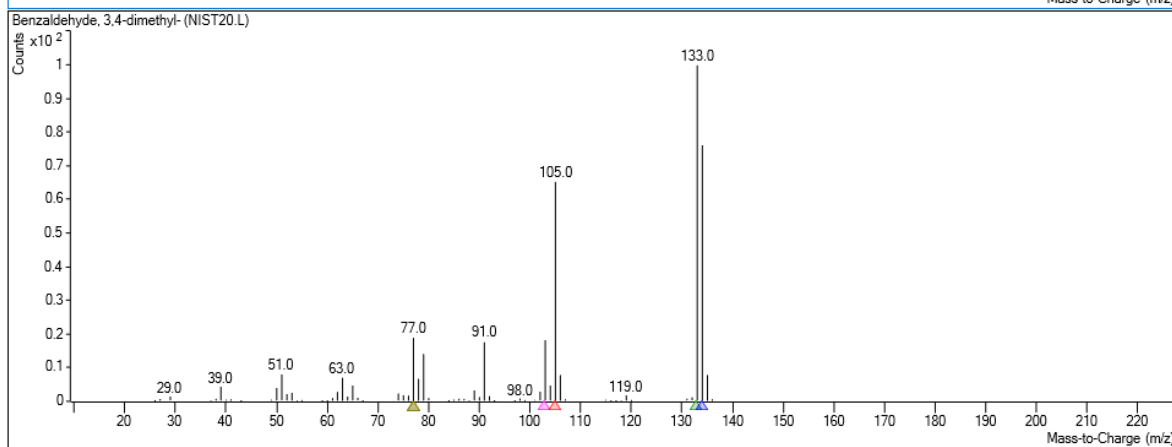

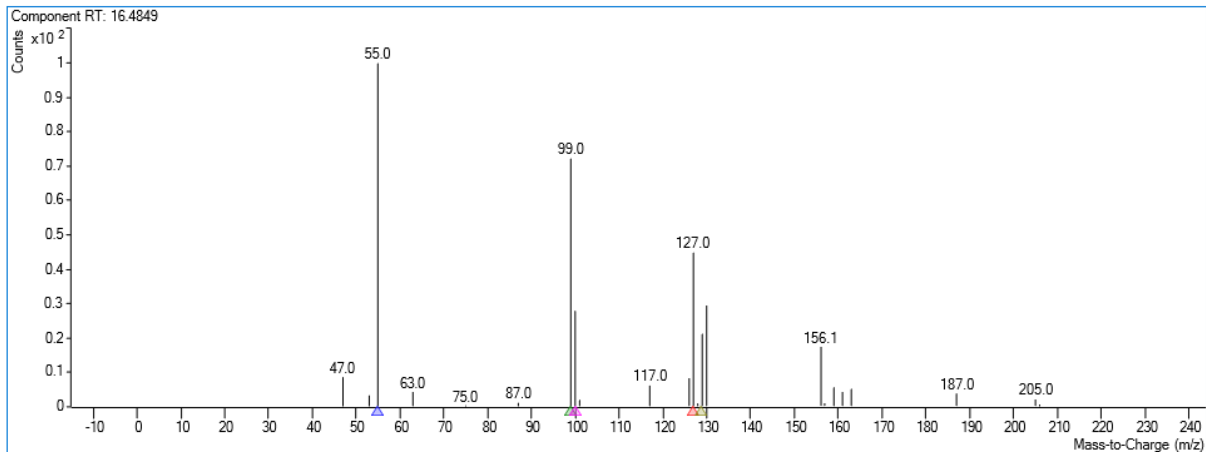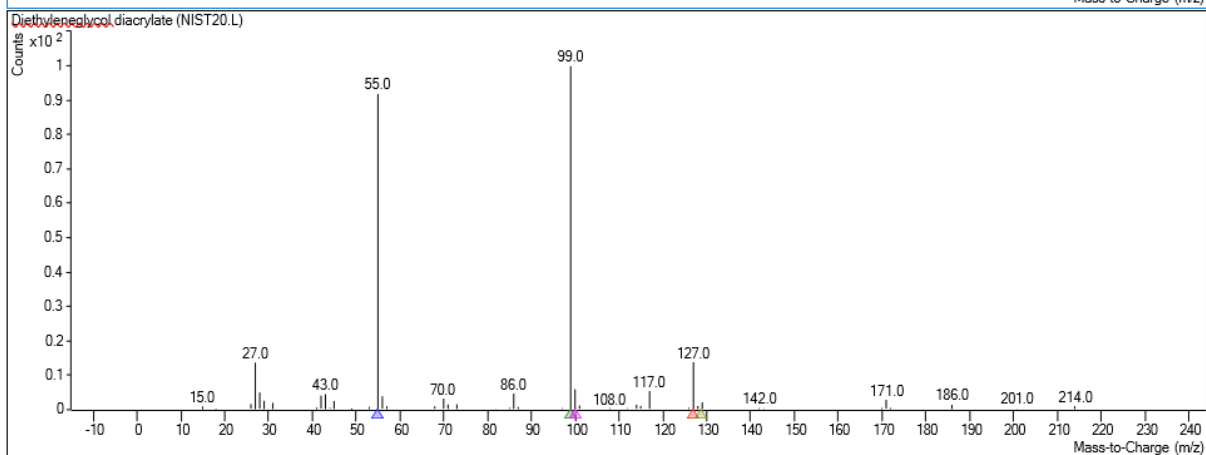

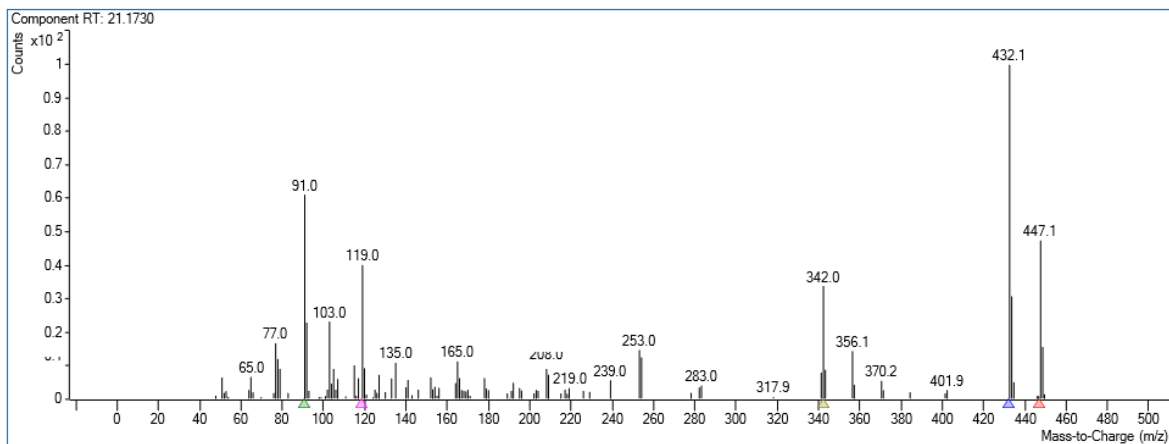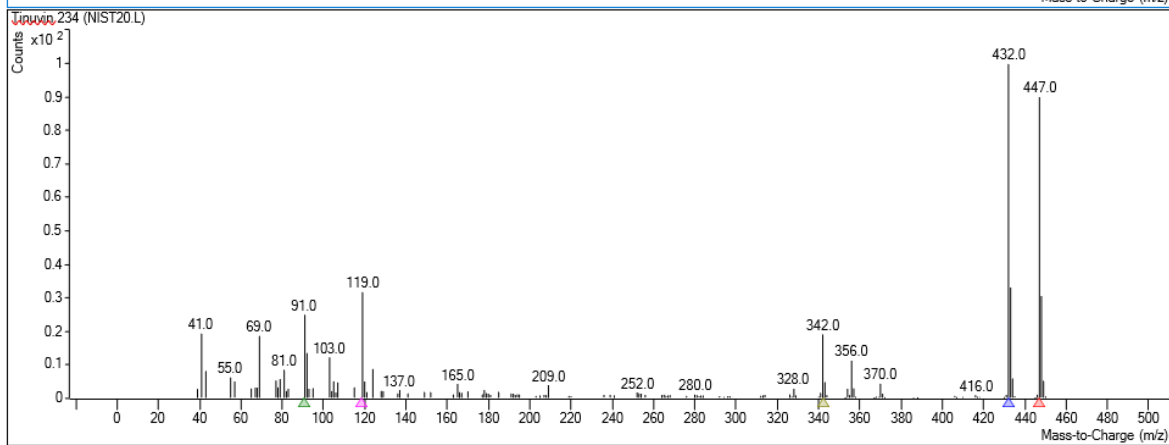

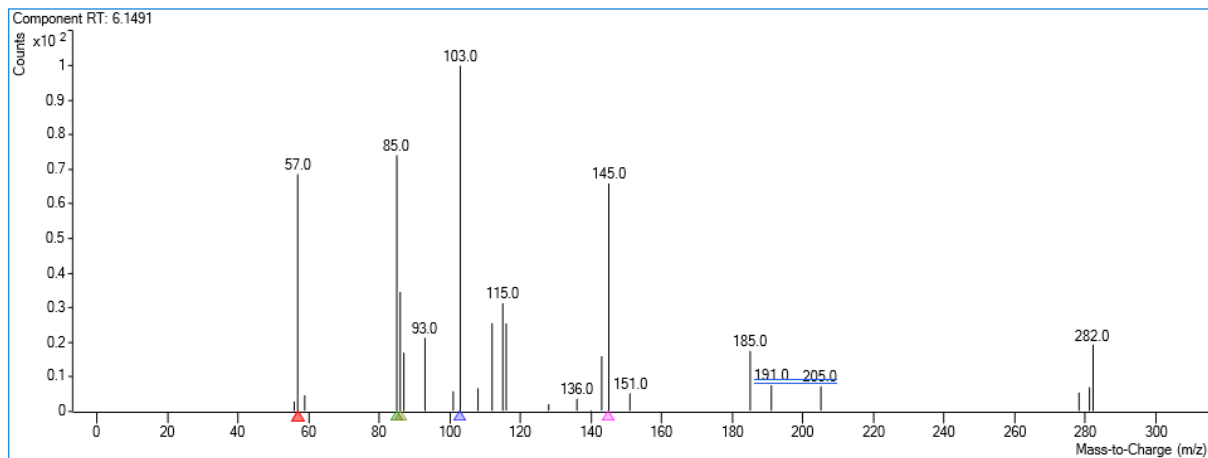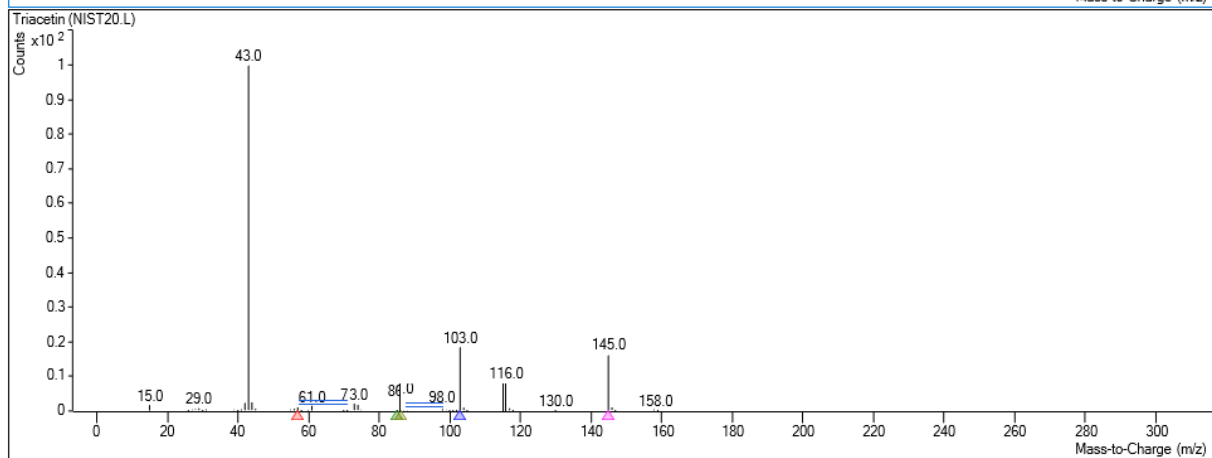

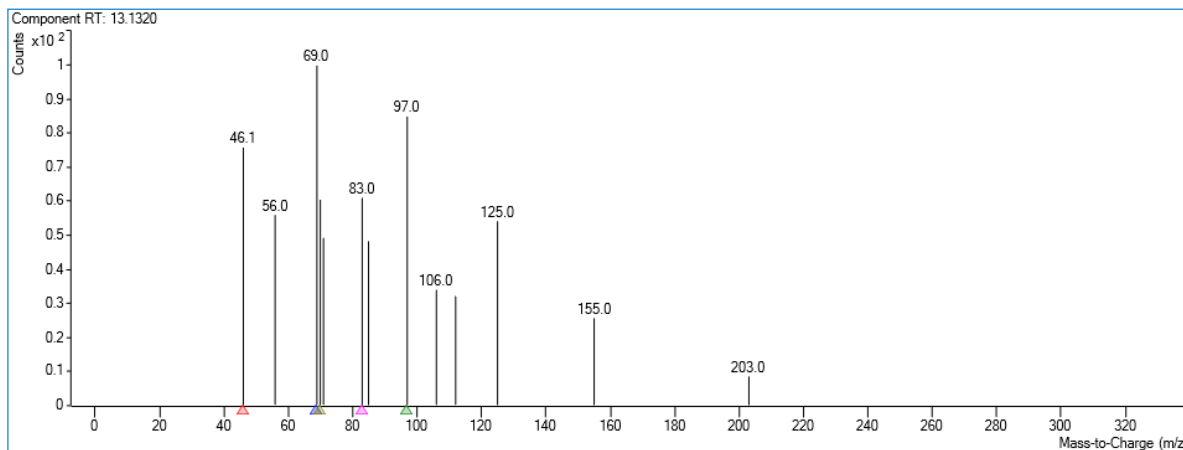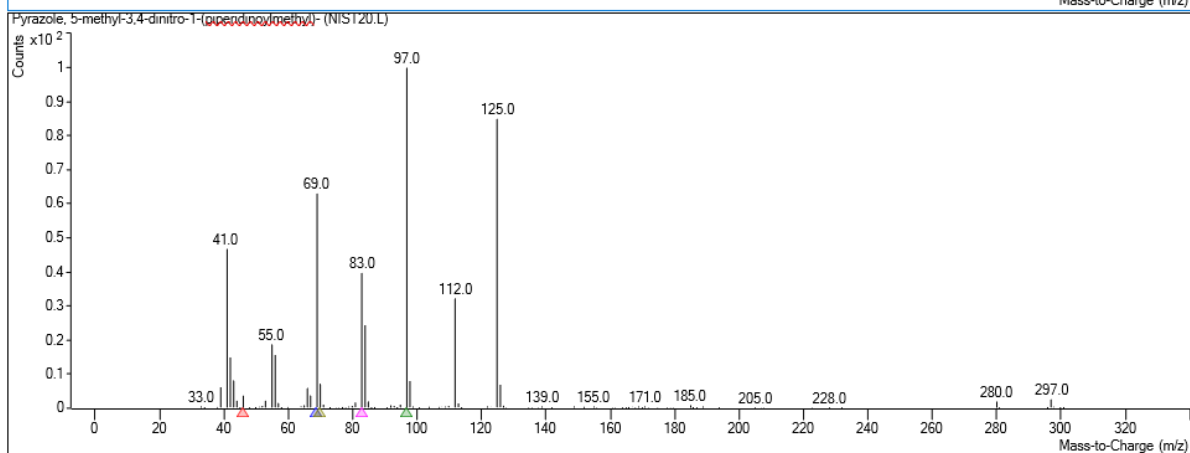

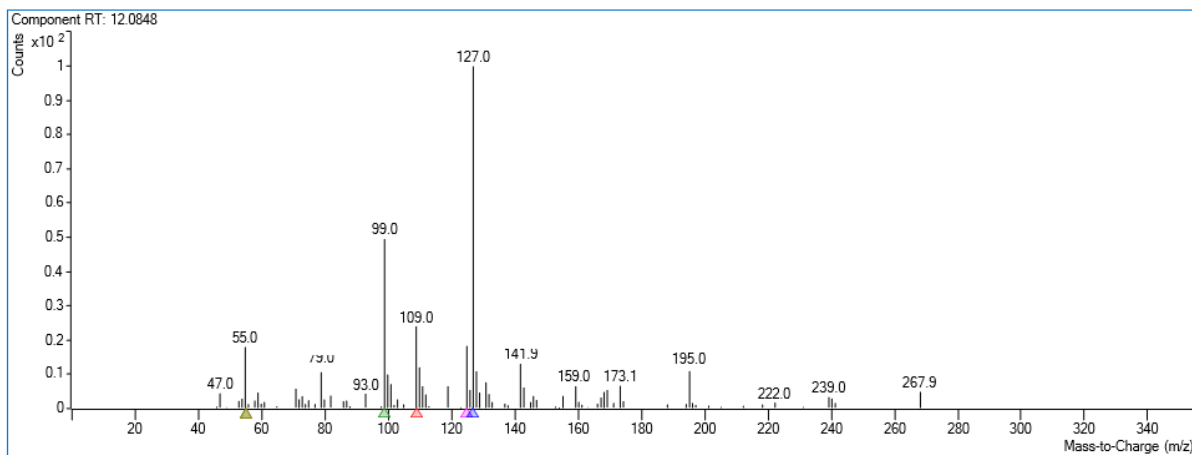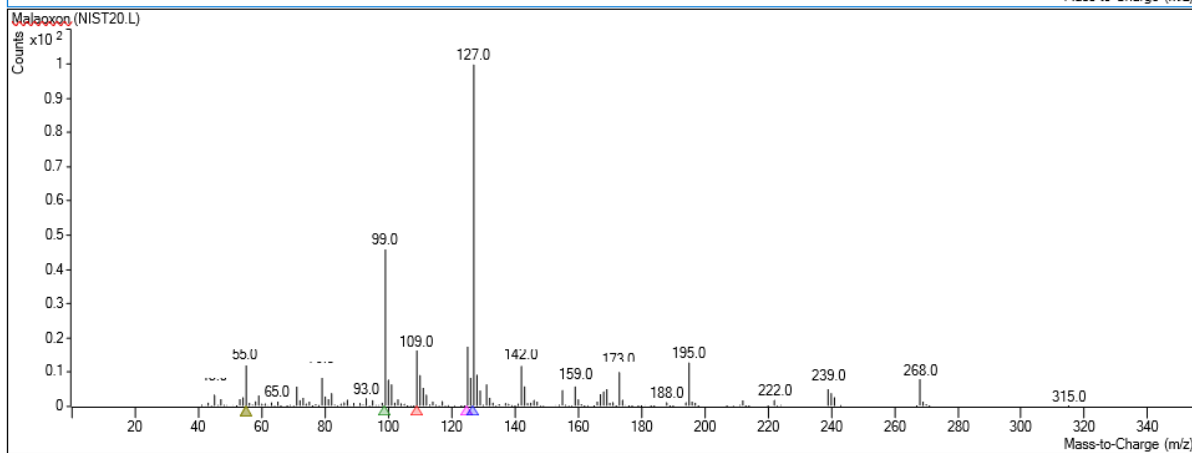

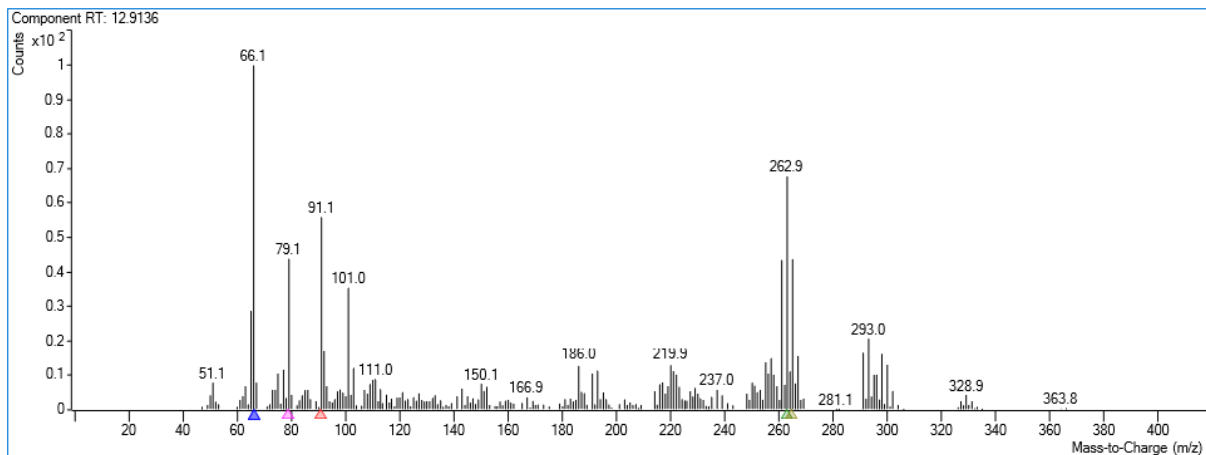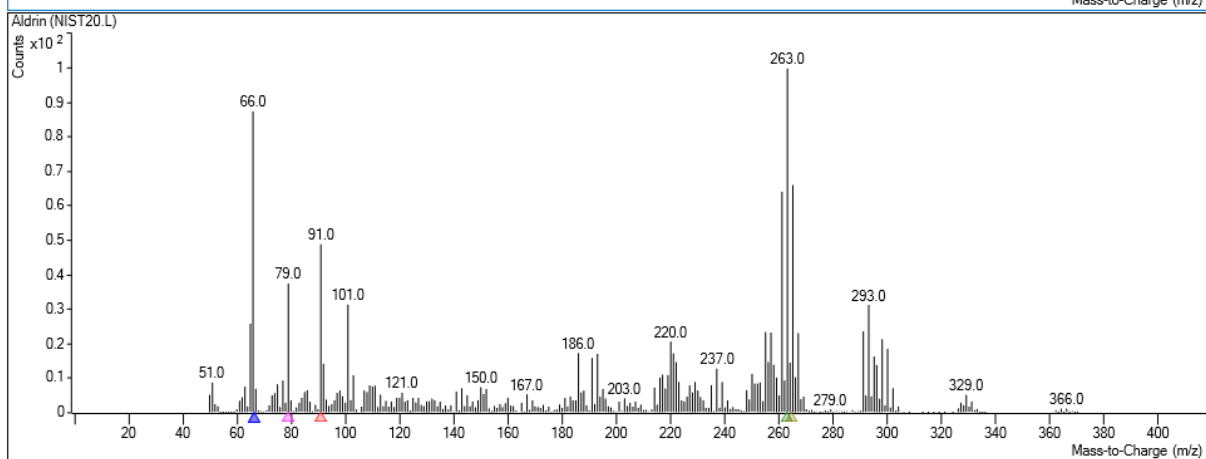

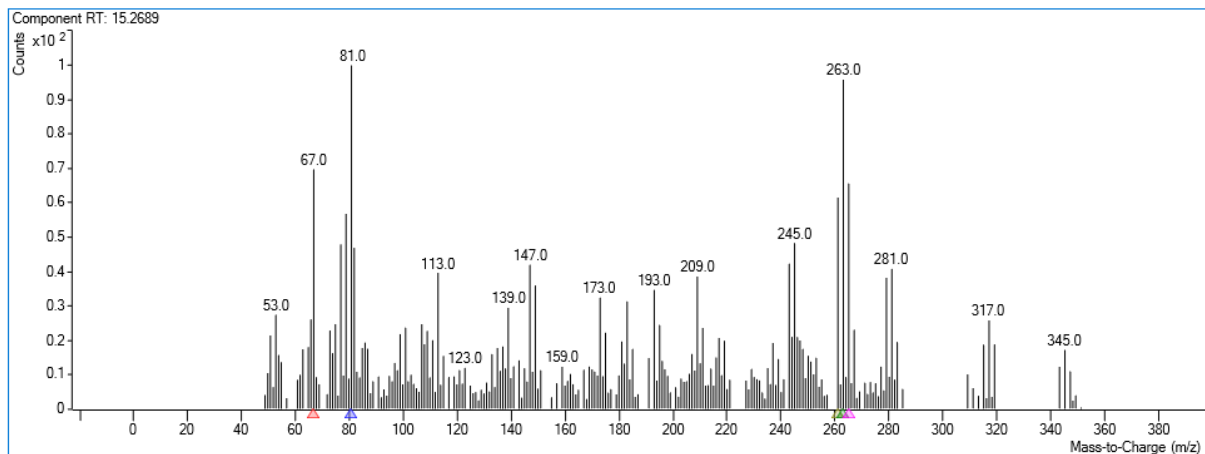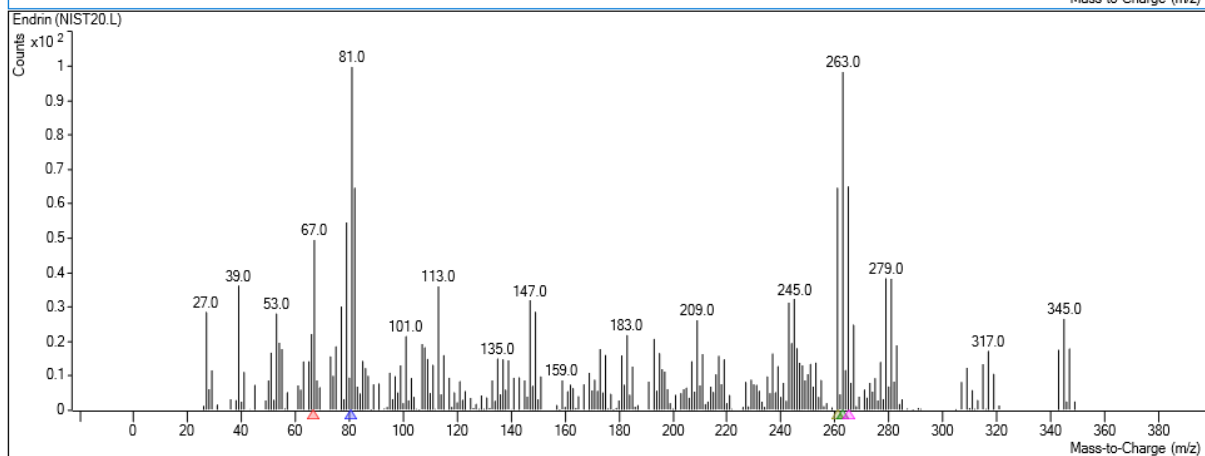



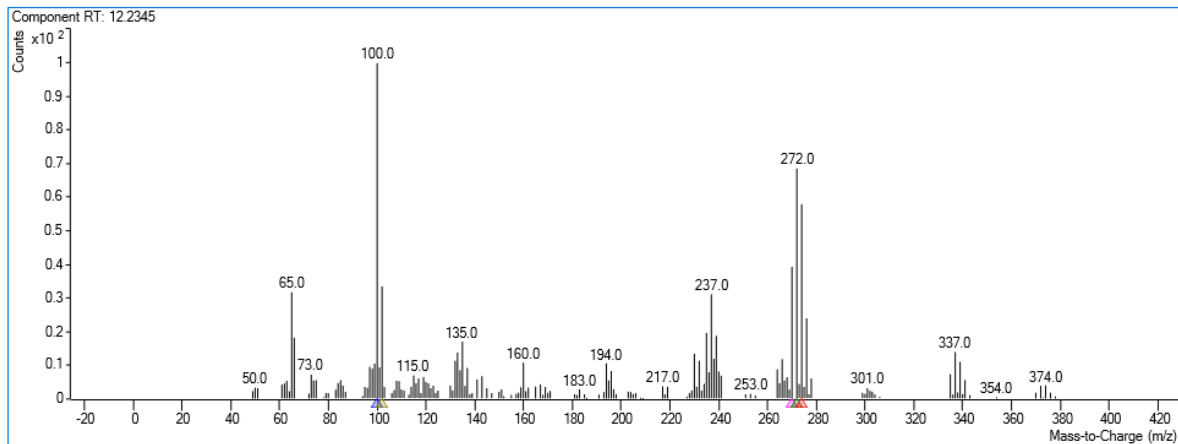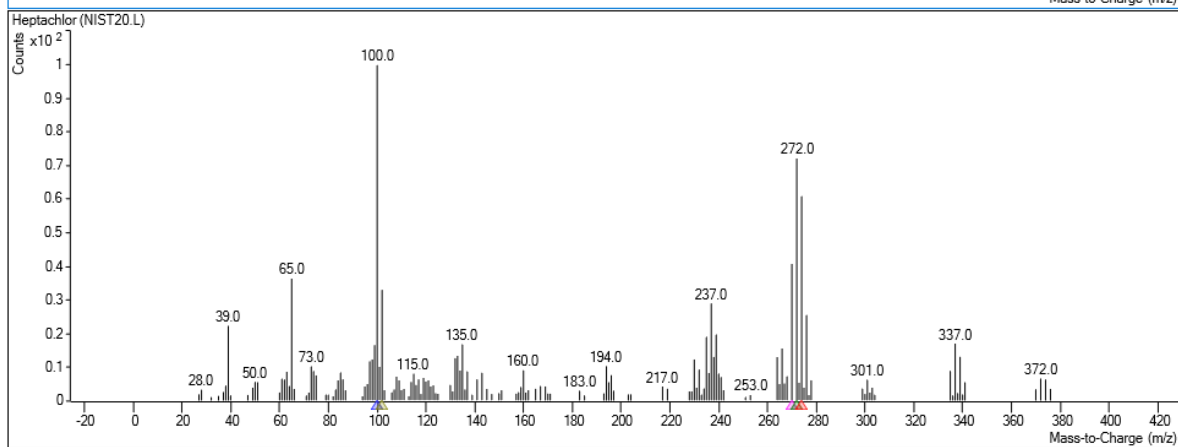

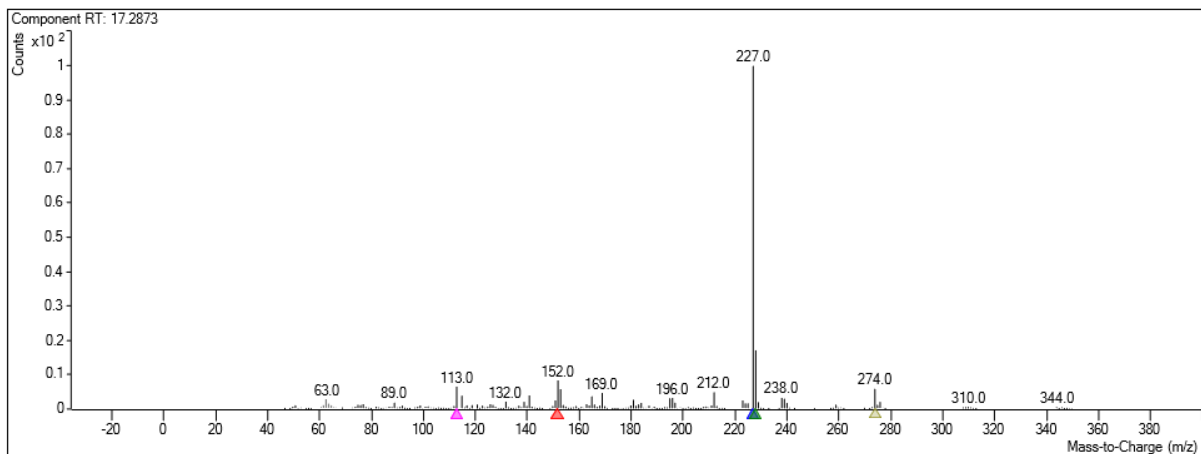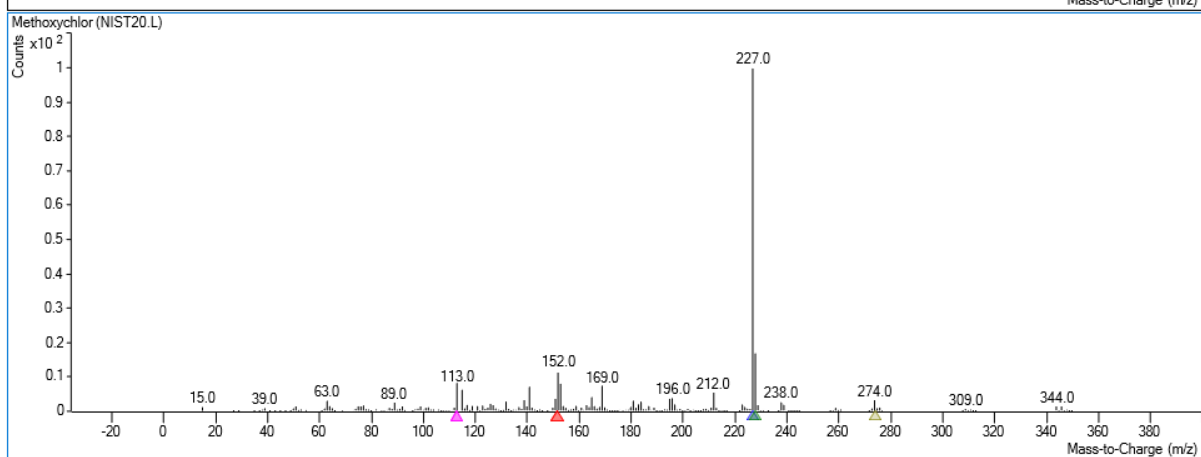

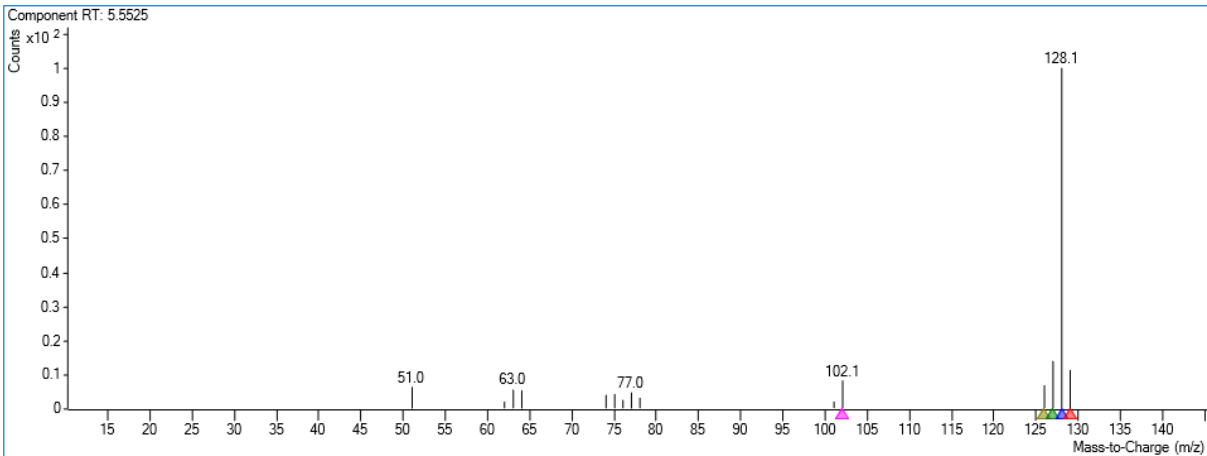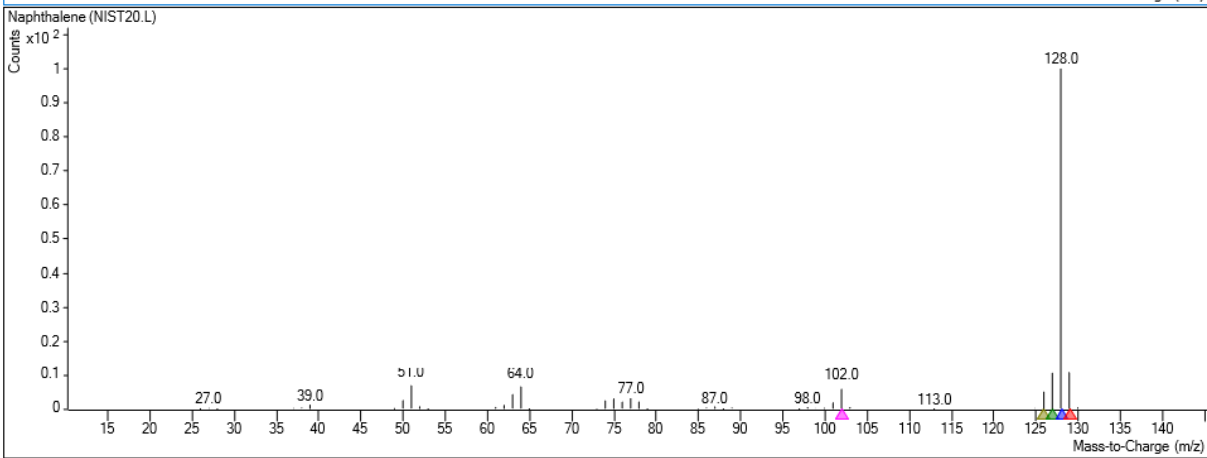

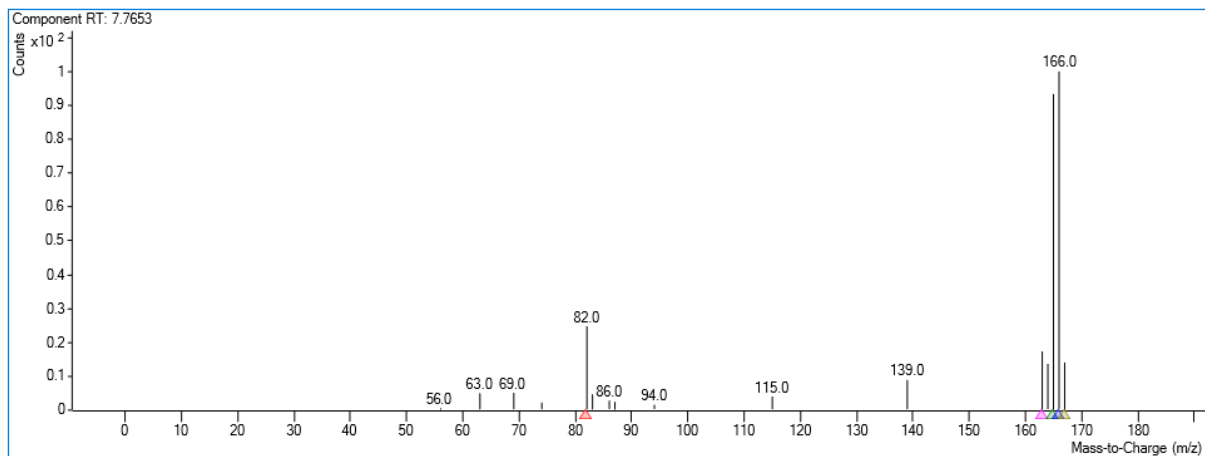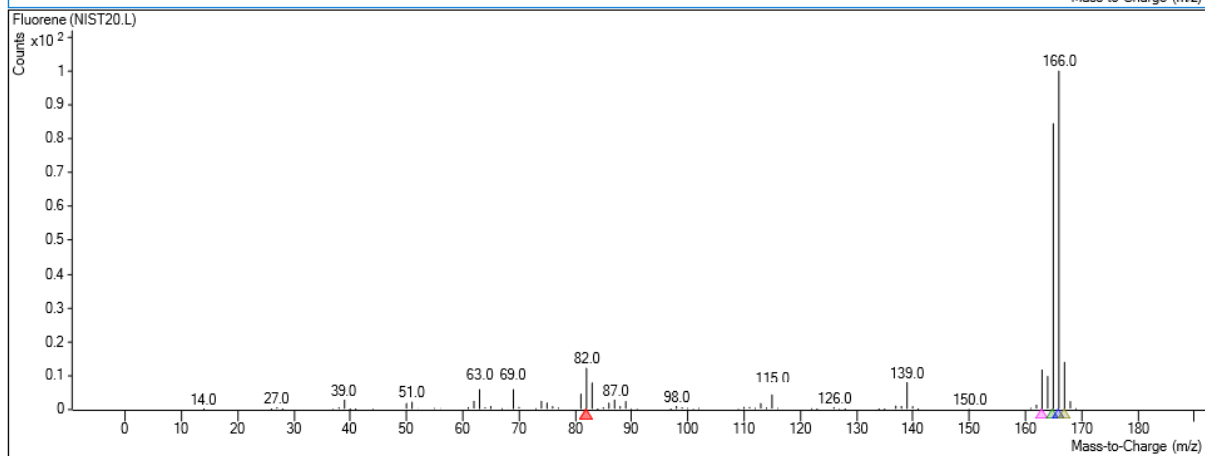

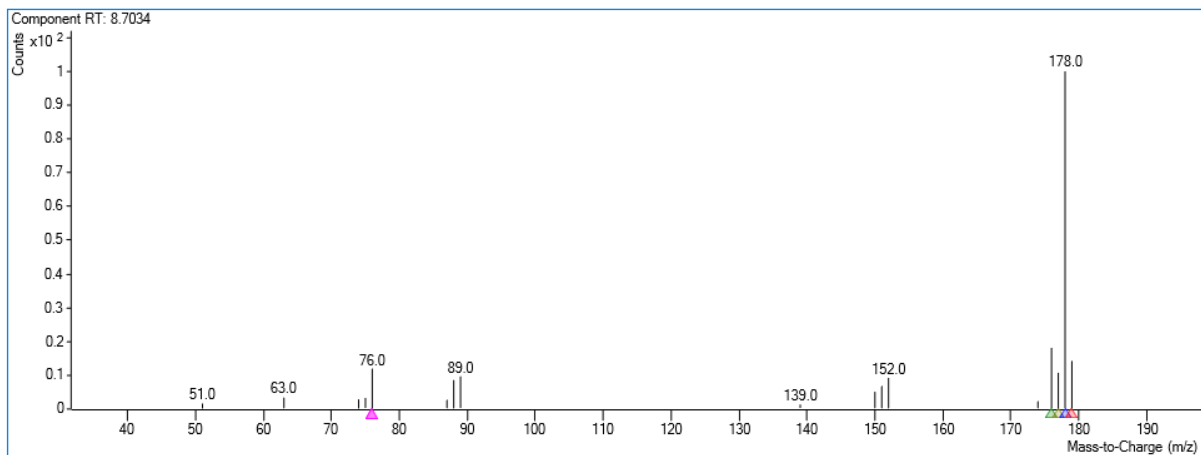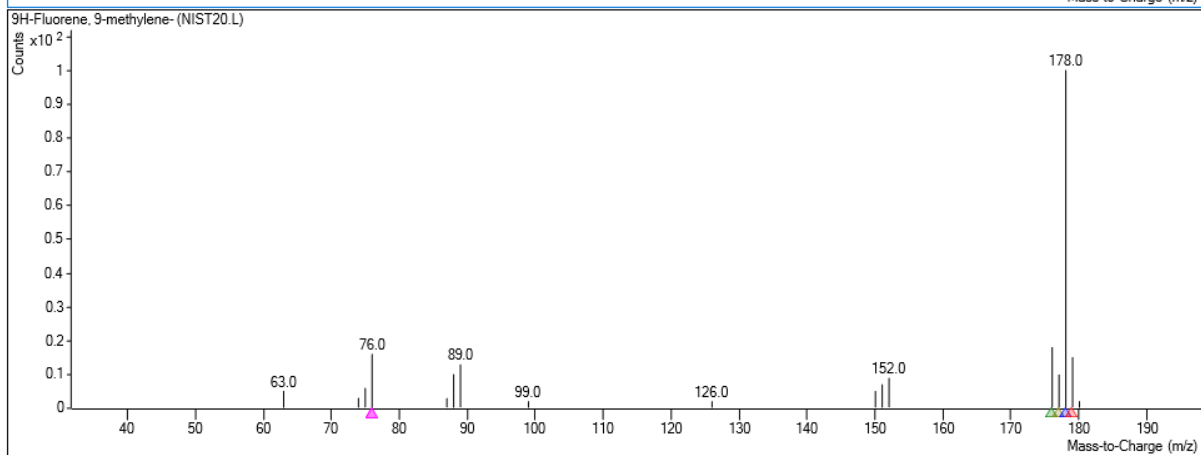

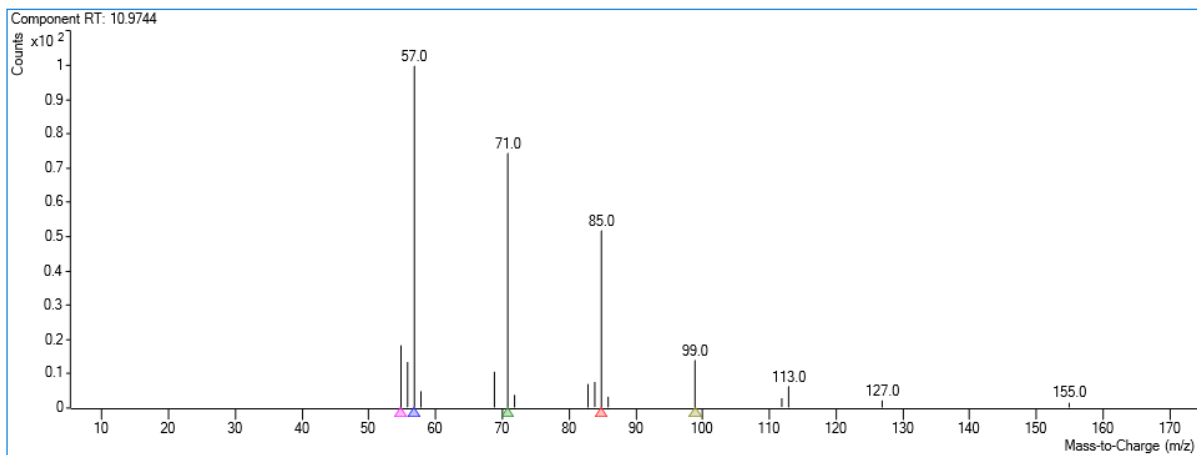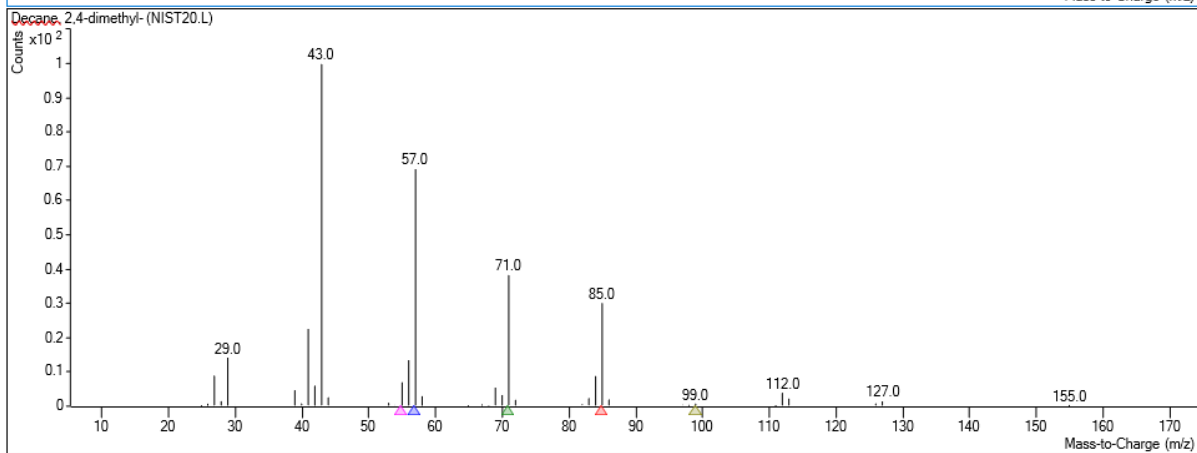

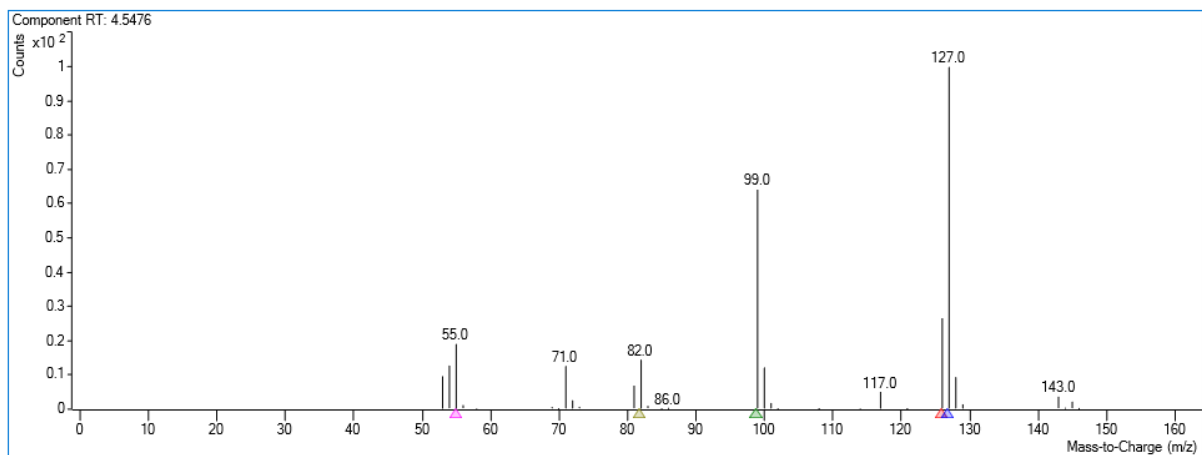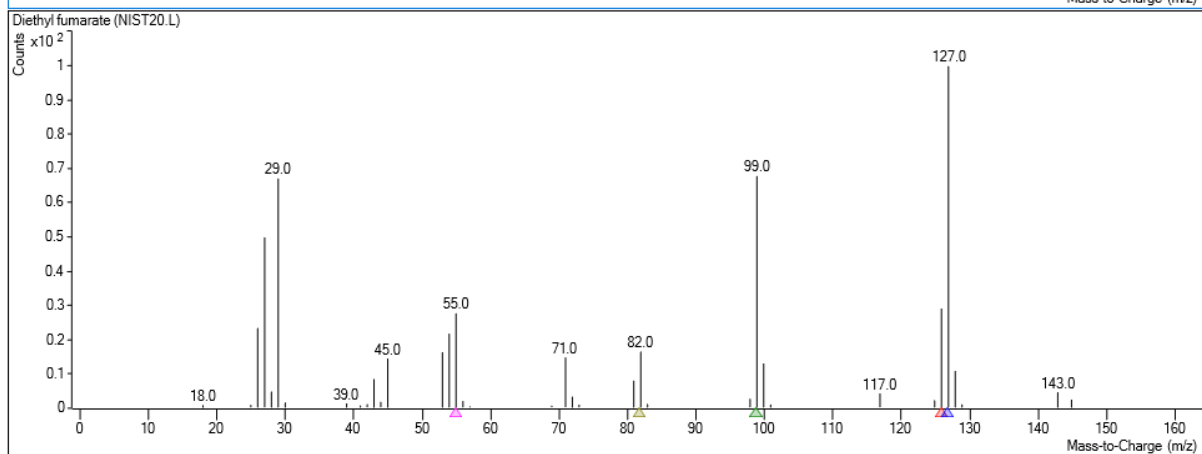

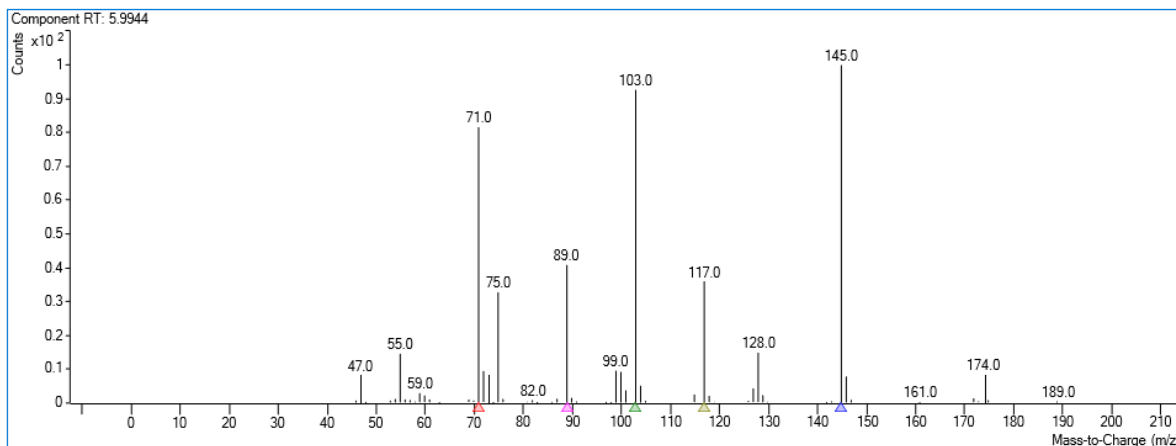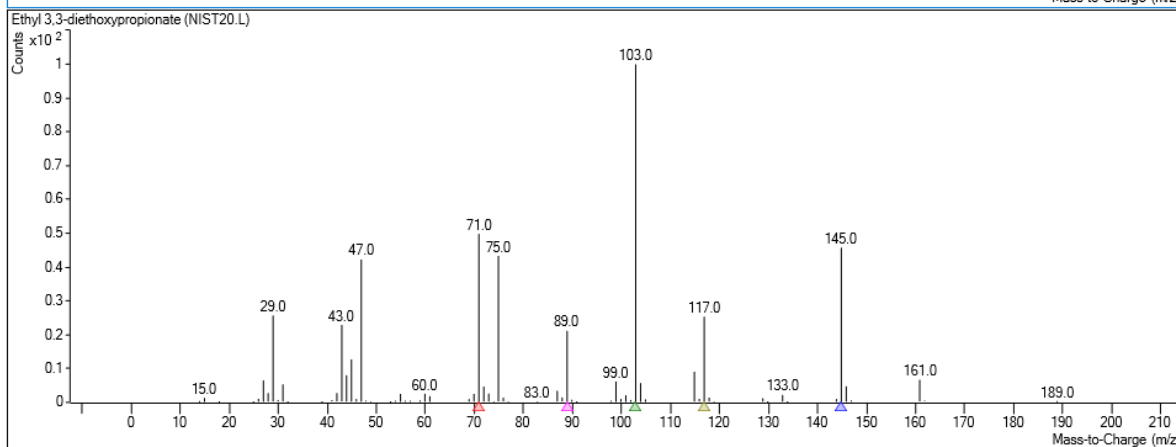



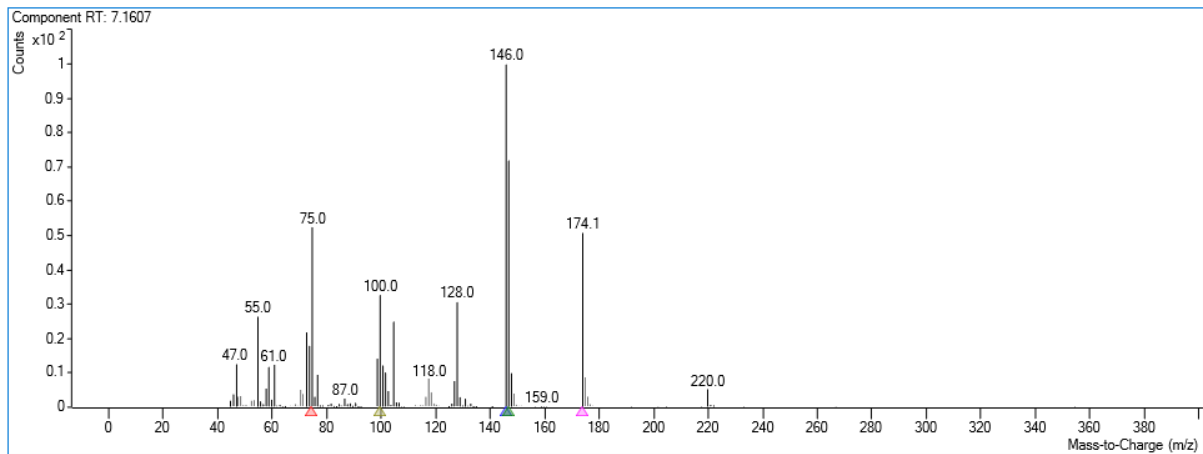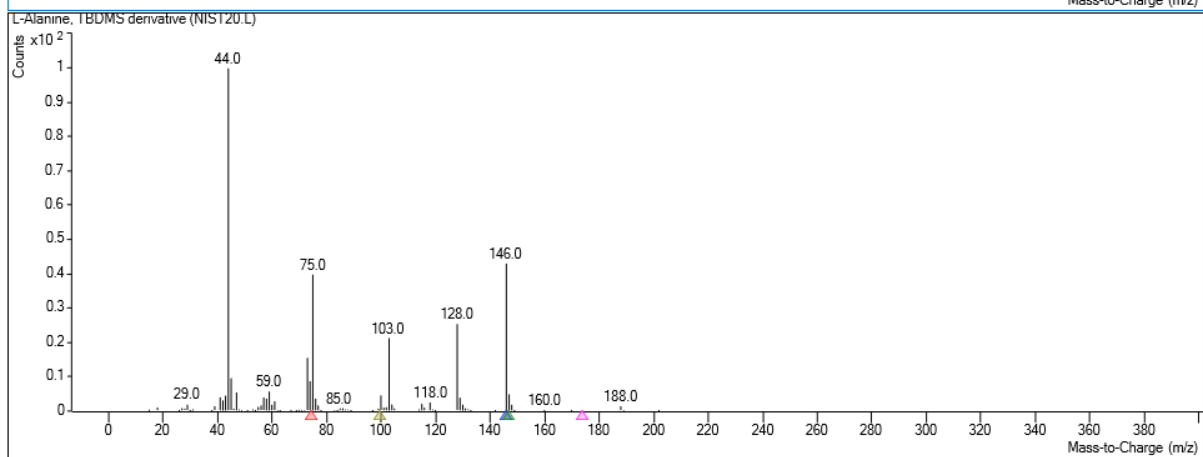

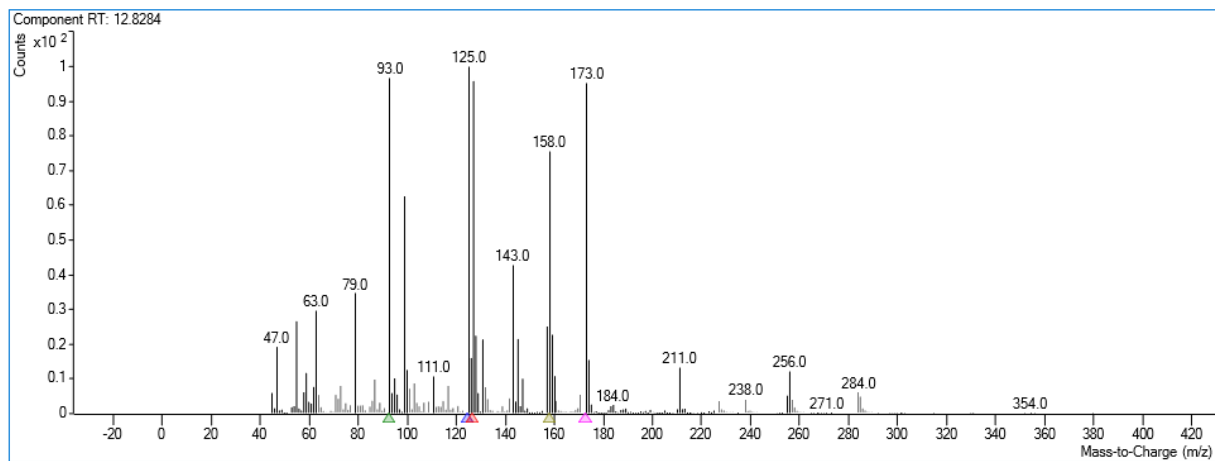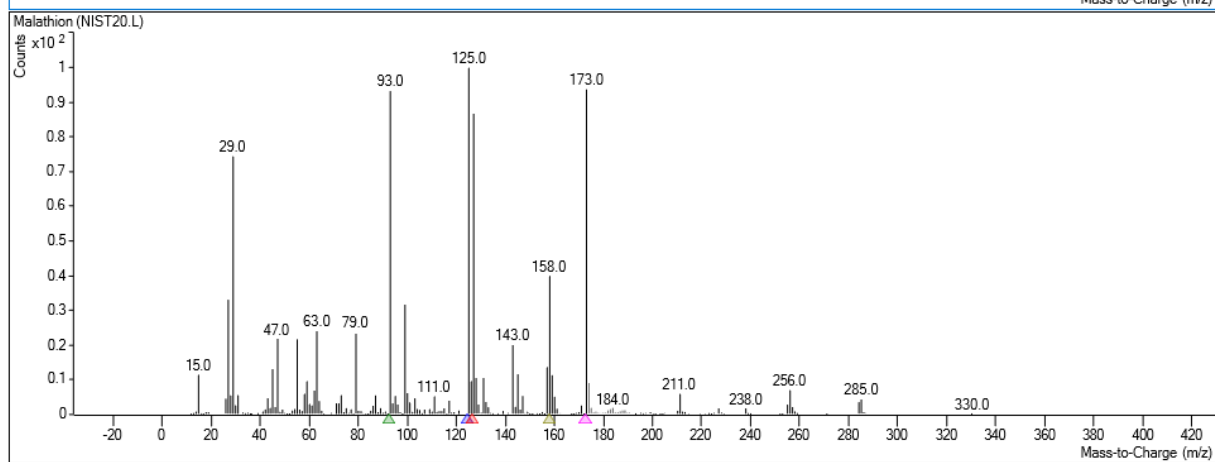

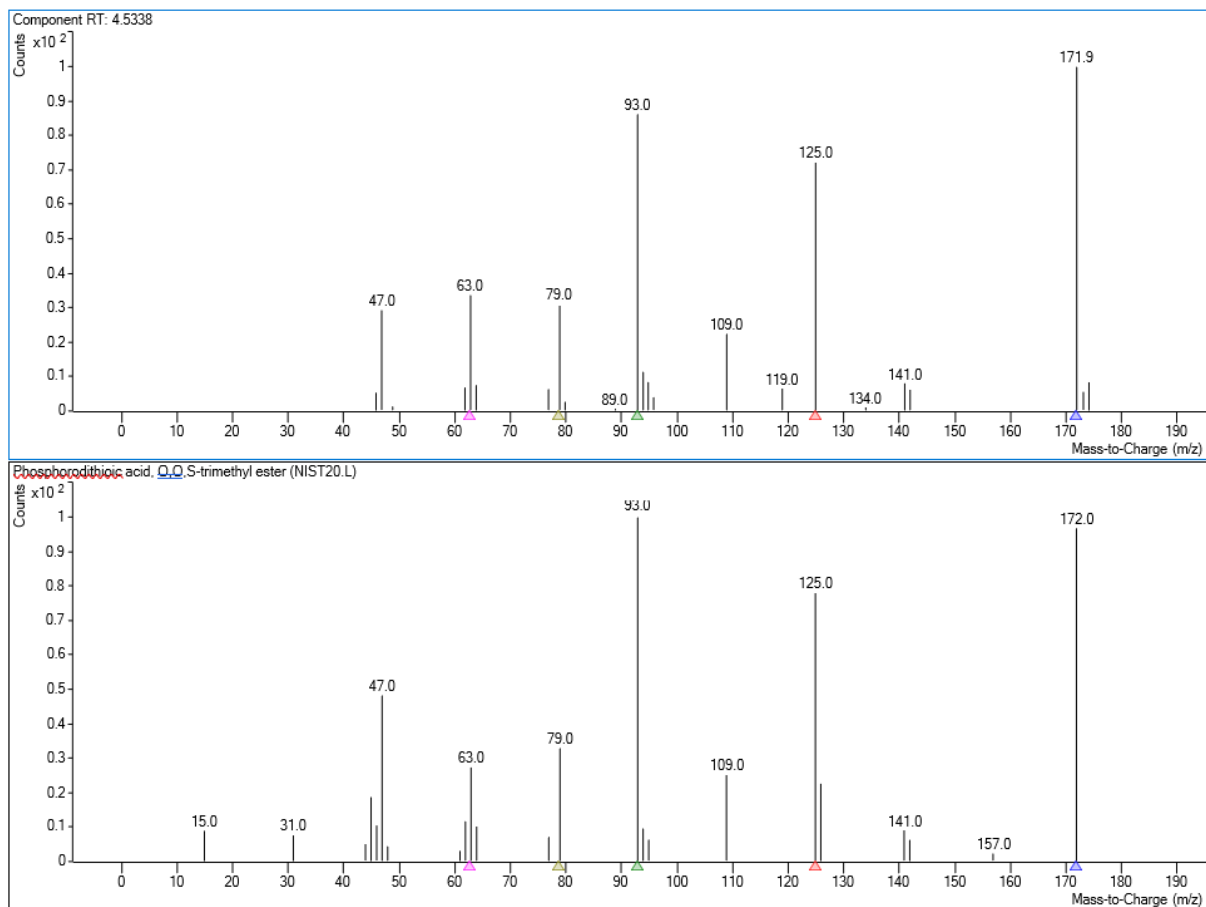

**Figure S2.** Mass spectra of all compounds identified with high confidence using non-targeted data analysis and molecular ion matches with corresponding spectra in the NIST library.
